# Supplementary material
Source: PubMed Central journal article supplement (PMC6839947)

**CD137 deficiency causes immune dysregulation with predisposition to  
lymphomagenesis**

Supplementary Appendix

**Table of Contents**

Supplementary Patient Clinical Histories

Supplementary Materials and Methods

Supplementary References

Supplementary Tables and Figures

## Supplementary Patient Clinical Histories

Patient 1 (All-1, Fig. 1A) was born to consanguineous Turkish parents, presented with Burkitt's lymphoma (Fig. 1B) at 2 years of age. A lobulated mass in the small intestine was observed (Fig. 1B). Subsequent imaging demonstrated renal and hepatic metastases (Fig. 1B, Fig. S1A), and a lesion in the right para-spinal area infiltrating the adjacent para-vertebral muscle (Fig. S1A). The patient was treated according to the NHL BFM 2000 treatment regimen, including cytoreductive prophase treatment with cyclophosphamide, dexamethasone, and intravenous methotrexate (block AA, BB and CC). Rituximab treatment was initiated due to CD20 positivity. A reduction in tumor size was observed and the patient is currently in remission at the age of 3 years. He also suffered from recurrent ear infections, hepatosplenomegaly and hypogammaglobulinemia (Tables 1 and S1). The patient has a 7-year old sibling (All-2, Fig. 1A) without obvious clinical phenotype and no family history of immunodeficiency.

Patient 2 (BII-1, Fig. 1A) was born to consanguineous Palestinian parents. He first presented with recurrent episodes of pneumonia (Fig. S1B) during the first 3 years of life. Bi-lateral ground glass opacities indicative of a chronic lung disease were subsequently demonstrated (Fig. S1C). He displayed autoimmune lymphoproliferative syndrome (ALPS)-like disease manifestations at the age of 6 years. Hepatosplenomegaly (Fig. S1D) and lymphadenopathy (Fig. S1E, S1F, S1G) were noted in physical examination and signs of autoimmunity including autoimmune hemolytic anemia (AIHA) and immune thrombocytopenic purpura (ITP) along with positive anti-nuclear antibodies (ANA) were detected (Tables 1 and S1). An Epstein-Barr virus (EBV)-related lymphoproliferative disorder with a monoclonal T-cell population was demonstrated in lymph node pathology (Fig. S1H) which was EBER positive (Fig. S1I). The patient was treated with sirolimus and glucocorticoids which he responded well to. Cellcept therapy has recently been initiated due to persistence of

autoimmune features (i.e. AIHA, ITP, ANA positivity) upon tapering of glucocorticoid treatment. Co-trimoxazole antibiotic prophylaxis is routinely administered as well. The patient has two siblings (BII-2, Fig. 1A) without overt clinical symptoms and no family history of immunodeficiency.

Patient 3 (CII-2, Fig. 1A), a boy born to consanguineous Turkish parents, manifested with herpes labialis and a lower respiratory tract infection at the age of six years. Hepatosplenomegaly (Fig. S1J) and lymphadenopathy were found during physical examination. Episodes of pneumonia, recurrent tonsillitis, otitis media and chronic suppurative otitis media were noted since the age of eight years (Table 1). Additional features included atopic dermatitis and xerosis. Laboratory evaluation revealed a positive direct Coombs test and hypergammaglobulinemia (Table S1), necessitating IVIG substitution therapy. At ten years of age, the patient was evaluated due to diffuse lymphadenopathy (bilateral cervical, submandibular and axillary nodes). An infectious etiology was ruled out. Submandibular lymph node biopsy exhibited large, prominent, multinucleated Reed-Sternberg cells (Fig. 1B) with EBER-positive lymph node histopathology (Fig. 1C). Immunohistochemistry showed weak CD20 staining and positive CD30 staining. Non-malignant nodular splenic lesions were observed, associated with lymphoproliferation. A diagnosis of Hodgkin lymphoma, stage 1, was established and the patient was treated according to GPOH-HD 95 therapy protocol, including two cycles of chemotherapy with adriamycin, vincristine, etoposide and prednisone. He is currently in remission. He is treated with immunoglobulin substitution and amoxicillin prophylaxis (Table 1). The patient has one sibling who is currently 14 years old (CII-1, Fig. 1A). She experienced recurrent tonsillitis until the age of ten years. Immunoglobulin levels were slightly elevated. Other than that, the patient has no remarkable family history of immunodeficiency.

Patient 4 (DII-2, Fig. 1A), a 33 year old male was born to non-consanguineous Colombian parents, presented with recurrent otitis media and sinusitis since the age of

eight. Between the age of 20-22 years, five episodes of pneumonia were documented. Laboratory workup revealed decreased serum IgG, IgM and IgA (Table S1) and no detectable IgG serum antibodies against rubella. The presumptive diagnosis of CVID was established and IVIG replacement therapy was initiated (Table 1). During the following 3 years, the patient was hospitalized with granulomatous pleuropneumonia, while *H. pylori* erythematous gastritis and chronic sinusitis (Fig. S1K) were noted. The patient has one healthy 32 year old sibling (DII-1, Fig. 1A). She suffered from recurrent infections during childhood. No family history of immunodeficiency is otherwise known.

## **Supplementary Materials and Methods**

### *Study Subjects*

All procedures were performed upon informed consent and assent from patients, first-degree relatives, and healthy donor controls in accordance with the ethical standards of the institutional and/or national research committees and with the current update of the Declaration of Helsinki.

### *Genetic Analysis*

Whole-exome sequencing was performed to determine the underlying genetic defect in *TNFRSF9* in all four patients. Genomic DNA was isolated from whole blood of patients and their first-degree relatives for generation of whole-exome libraries using the SureSelect XT Human All Exon V5+UTR or V6+UTR kit (Agilent Technologies, USA). Barcoded libraries were sequenced on a NextSeq 500 platform (Illumina, USA) with an average coverage depth of 100x. Bioinformatics analysis and subsequent filtering identified rare sequence variants. *TNFRSF9/CD137* mutations were confirmed by Sanger sequencing.

*In silico* analysis of the exon 2: c.100+1G>A substitution was performed with the bioinformatics tools NetGene2 (<http://www.cbs.dtu.dk/services/NetGene2/>) and

Fruitfly ([http://www.fruitfly.org/seq\\_tools/splice.html](http://www.fruitfly.org/seq_tools/splice.html)). These tools predicted that the mutation affected the donor splice site at the end of exon 2. Moreover, multiple alignments of DNA sequences of *CD137* orthologous from several species show that exon2: c.100 +1G is a highly conserved region. We used the SIFT, PolyPhen-2 and CADD algorithms to assess these *in silico*<sup>1</sup>.

#### *Expansion of T cells*

Patient or control blood was subjected to a Ficoll density gradient centrifugation, after which peripheral blood mononuclear cells (PBMCs) were collected from the interface. T cells were expanded by stimulation of the PBMCs with irradiated feeder cells (PBMCs from healthy donors), PHA (1µg/ml) and IL-2 (100U/mL) in RPMI medium containing 5% human serum. Cell lines were tested negative for mycoplasma by PCR using VenorGeM Mycoplasma Detection Kit (MP0025, Sigma-Aldrich).

#### *Flow Cytometry*

For analysis of cell surface markers, PBMCs were used as starting material or 100 µl of whole blood in EDTA was lysed using RBC Lysis Buffer (eBioscience). Cells were washed twice in FACS buffer (PBS with 5% FBS), and resuspended in 100 µl of FACS buffer with antibodies for 30 min on ice. Cells were washed twice in FACS buffer, resuspended in 300 µl of FACS buffer.

#### *Western Blot*

Whole cell lysates were prepared from control- and patient-derived expanded T cells or B-LCLs, loaded on 10% polyacrylamide TRIS-HEPES-SDS gel and separated by SDS-PAGE. Proteins were transferred to polyvinylidene difluoride (PVDF) membrane using iBlot system (Invitrogen). Blots were probed overnight with 1:1000 dilution of specific antibodies, and 1:8000 dilution of anti-HSP90α/β (Santa

Cruz) as a loading control. Bands were revealed using Amersham ECL Select Western Blotting Detection Reagent (GE Healthcare).

#### *T- and B-cell stimulation*

PBMCs were labeled with either CellTrace Violet Cell Proliferation dye VPD450 (ThermoFisher) or CFSE 5 $\mu$ M (ThermoFischer), washed with PBS with 10% FCS in a ratio of 1:1. Labeled PBMCs were stimulated with anti-CD3-coupled beads (Bio-anti-CD3, OKT3 from eBioscience coupled with anti-Biotin MACSiBeads from Miltenyi Biotec) at a ratio of 10:1 with and without 1  $\mu$ g ml<sup>-1</sup> soluble anti-CD28 (CD28.2, eBioscience) or anti-CD3 with anti-CD137, 10  $\mu$ g/ml (R&D Systems) or CD137L, 20 ng/ml (R&D Systems) and stained for cell surface markers. For blocking experiments of CD137 in T cells, a neutralizing anti-CD137 monoclonal antibody (BBK-2 clone, Invitrogen) was added at increasing concentrations (1-2 $\mu$ g/mL) or mouse IgG1, kappa isotype control P3.6.2.8.1 (Invitrogen) to anti-CD3-coupled beads and stained for cell surface markers. For B-cell proliferation assays PBMCs were stimulated with CpG ODN 2006, 50nM (ODN7909, Invivogen), or CD40 ligand 200ng/ml (R&D Systems) in combination with rhIL4 100 ng/ml, rhIL21 20ng/ml (R&D Systems) or anti-IgM 20 $\mu$ g/ml (Southern Biotech). For sorting of CD3 T cells and naïve B cells, PBMCs were stained for CD3, CD19, CD27 and IgD: PE-CY7 anti-CD3 (Beckman Coulter), PerCP/Cy5.5 anti-CD19 (HIB19, Biolegend), BV480 anti-IgD (IA6-2, BD), PE anti-CD27 (L128, BD), and afterwards sorted by FACS for CD3<sup>+</sup>, CD19<sup>+</sup>CD27<sup>-</sup>IgD<sup>+</sup> or CD19<sup>+</sup>CD27<sup>+</sup> populations, respectively. Sorted PBMCs were then labeled with either CellTrace Violet Cell Proliferation dye VPD450 (ThermoFisher) or CFSE, stimulated as mentioned above, and re-stained for cell surface markers.

#### *Flow cytometry-based CTL cytotoxicity test*

Assays to quantify the cytotoxic activity of CTLs were done by stimulating PBMCs with 30Gy irradiated autologous B-LCLs at 5:1 ratio in complete RPMI (Gibco)

with 10ng/mL IL-7 (Peprotech) for 14 days. At day 7, 100U/mL IL-2 (Peprotech) was added. Two rounds of stimulation were performed every 14<sup>th</sup> day. CD8<sup>+</sup> T cells were sorted with MagniSort Human CD8<sup>+</sup> T-cell Enrichment Kit according to manufacturer's instructions. Autologous EBV B-LCLs were stained with VPD450 (ThermoFisher) and used as targets. CD8<sup>+</sup> T cells were incubated for 4 hours at different ratios of effector and target cells. Cytotoxicity was evaluated by flow cytometry gating on CD19<sup>+</sup> and VPD450<sup>+</sup> cells.

#### *Flow cytometry-based CTL and NK-cell degranulation test*

NK- and CTL degranulation was assessed by CD107a surface staining without (medium-cultured cells) and 3 hours after stimulation with K562 cells at a ratio of 1:1 as previously described<sup>2</sup>. The erythroleukemic cell line K562 (ATCC, CCL-243) was used as a target cell line. NK cells were cultured in medium containing 600U/ml IL-2 (Novartis) for 48 h to assess degranulation of activated NK cells. CTL (cytotoxic T lymphoblasts) degranulation was evaluated in T-lymphoblasts 48 h after stimulation with 1.25 mg/ml 1- phytohemagglutinin-L (PHA-L, Sigma) and 200U/ml IL-2 (Novartis). CTL degranulation was calculated by the difference in median fluorescence intensity of CD107a of CTLs stimulated with CD3/CD28-coated microbeads (ThermoFisher Scientific) at a ratio of 1:10 for 3 h and medium cultured cells.

#### *Flow cytometry and antibodies*

For immunophenotyping the following antibodies were used: BV480 anti-CD45 (clone HI30, BD), APC-Fire 780 anti-CD3 (SK7, Biolegend), BUV395 anti-CD4 (RPAT4, BD), BUV496 anti-CD8 (RPAT8, BD), APC anti-CD45RA (BUV737, BD), BB515 anti-CD45RO (UCHL1, BD), APC anti-CD127 (A019D5, Biolegend), PE anti-CD25 (M-A251, BD), APC R-700 anti-CD27 (M-T271, BD), BB700 anti-CD28 (L293, BD), BV711 anti-HLA-DR (L243, Biolegend), BV421 anti-CCR7 (G043H7, Biolegend), BV786 anti-

CCR6 (11A9, BD), PE-CF594, anti-CXCR3 (1C6, BD), BV650 anti-CD38 (HB-7, Biolegend), BUV395 anti-CD19 (SJ25C1, BD), PE-Cy7 anti-CD20 (2H7, BD), BB515 anti-IgD (IA6-2, BD), BV421 anti-IgM (G20-127, BD), APC anti-CD38 (HB7, BD), BUV737 anti-CD21 (B-Ly4, BD), BV786 anti-CD27 (L128, BD), PE anti-CD10 (HI10a, BD), BUV496 anti-CD3 (UCHT-1, BD), BUV737 anti-CD8 (SK1, BD), PE-CF594 anti-CD56 (NCAM16.2, BD), BB515 anti-CD57 (NK-1, BD), BB700 anti-CD15 (M5E2, BD), APC anti-CD16 (3G8, Biolegend), HLA-DR anti-BV711 (L243, Biolegend), BV785 anti-CD123 (6H6, BD), BV421 anti-CD11c (B-ly6, Biolegend), PE anti TCR g-d (5A6.E9, Life Tech), APC-R700 anti-TCR a-b, (IP26, Biolegend), PE-Cy7 anti-CD33 (P67.6, BD), and BV711 anti-CXCR5 (J2252D4, Biolegend).

CD137 and CD137L expression in T cells was measured upon 48 hour stimulation of PBMCs with anti-CD3 and anti-CD28. Cells were stained with PacB anti-CD3 (clone SK7, biolegend), BV711 anti-CD4 (SK3, BD), APC-Fire 750 anti-CD8 (RPA-T8, Biolegend), PE anti-CD25 (M-A251, BD), APC anti-CD137 (4B4-1, BD) or APC anti-CD137L (5F4, Biolegend). Expression in B cells was measured upon 24 hour stimulation of PBMCs with anti-IgM in combination with CD40L (RnD). PBMCs were stained with PacB anti-CD3 (clone SK7, Biolegend), PerCP/Cy5.5 anti-CD19 (HIB19, Biolegend), BV421 anti-CD86 (FUN-1, BD), CD25 (M-A251, BD), APC anti-CD137 (4B4-1, BD). Expression in activated NK cells was measured upon 48 hours stimulation of PBMCs with IL-2 600U/ml (Novartis). PBMCs were stained with FITC anti-CD56 (NCAM16.2, BD), PacB anti-CD3 (SK7, Biolegend), APC anti-CD137 (4B4-1, BD).

Proliferative responses were measured by labeling PBMCs with 2.5 mM carboxyfluorescein diacetate succinimidyl ester (CFSE, ThermoFisher), 7-aminoactinomycin D (7-AAD, 2.5 mg/ml, BD), PacB-anti-CD3 (clone SK7, biolegend), PE-anti-CD25 (M-A251, BD), APC-Fire 750 anti-CD8 (RPA-T8, Biolegend)) and BV711 anti-CD4 (SK3, BD) 4 days after stimulation. Class-switch recombination and plasmablast numbers were measured 4 days after stimulation. PBMCs were stained with BUV395 anti-CD3 (clone SK7, BD), PerCP/Cy5.5 anti-CD19 (HIB19, Biolegend),



BV421 anti-IgD (IA6-2, BD), PE anti-CD27 (L128, BD), BUV661 anti-CD38 (HIT2, BD). Degranulation of NK cells and CTLs (cytotoxic T lymphocytes) was determined by surface staining with PacB-anti-CD3 (clone SK7, 1:100), APC-H7-anti-CD8 (SK1, 1:100), PE-Dazz-anti-CD56 (NCAM16.2, BD), FITC anti-CD56 (NCAM16.2, BD), and PE-anti-CD107a (H4A3, 1:50). T-cell signaling was performed in T cell blasts. PBMCs were stimulated with 5 ng/ml phorbol 12-myristate 13-acetate (PMA) and 1  $\mu$ M ionomycin (Sigma-Aldrich) and expanded with IL-2 (100U/ml) for 9 days. T-lymphoblasts were stimulated by cross-linking of anti-CD3 (UCHT1) 2.5  $\mu$ g/ml and/or 10  $\mu$ g/ml anti-CD28 (CD28.2) with 10  $\mu$ g/ml goat anti-mouse IgG all from BD for the indicated time. Cells were fixed and permeabilized with fixation and permeabilization kit from Molecular Probes in 90% methanol. The permeabilized cells were stained with the following intracellular antibodies detecting: ERK1/2 phosphorylated at T202 and Y204 (A647 anti-pERK1/2, BD), NF $\kappa$ B P65 phosphorylated at S529 (A647 anti-NF $\kappa$ B P65, BD), AKT phosphorylated at S473 (A488 anti-pAKT, (M85-61, BD)), isotype control (A488 mouse IgG  $\kappa$ 1 isotype control, BD).

#### *TCR Repertoire and Analysis*

Cell surface marker expression of peripheral blood mononuclear cells (PBMCs) was analyzed by immunofluorescent staining with monoclonal antibodies and flow cytometry (Epics V; Coulter Electronics, Hialeah, FL). Signal joint T-cell receptor excision circles (sjTREC) copy numbers were determined by employing quantitative real-time PCR (qRT-PCR) of genomic DNA (gDNA, 0.5  $\mu$ g) extracted from whole blood of our patients. Surface expression of individual T cell receptor V $\beta$  (TCR-V $\beta$ ) gene families was assessed using a set of 24 V $\beta$ -specific fluorochrome-labeled monoclonal antibodies (Beckman Coulter, USA) and flow cytometry. Next-generation sequencing (NGS) T-cell receptor (TCR) libraries were generated from gDNA of patients and controls using primers for conserved regions of V and J genes in the *TRG* (T-cell receptor gamma) locus according to the manufacturer's protocol (Lymphotrack,

Invivoscribe Technologies, Carlsbad, CA). Quantified libraries were pooled and sequenced using Mi-Seq Illumina technology (Illumina, USA). FASTA files from the filtered sequences were submitted to the IMGT HighV-QUEST webserver (<http://www.imgt.org>), filtered for productive sequences (no stop codons or frameshifts), and analyzed. Repertoire diversity was calculated using Shannon's H diversity index and Simpson's D index of unevenness.

Shannon's H index: 
$$H' = -\sum_{i=1}^R p_i \ln p_i$$

Simpson's D index of unevenness: 
$$\lambda = \sum_{i=1} p_i^2$$

#### *Retroviral Construction and Transfection Protocol*

N-terminally tagged CD137 was generated using retroviral pfMIG 3981 (IRES-GFP) vector. For the reconstitution experiments constructs with either wild-type CD137 or empty vector (GFP only) were used. Before electroporation of the Patient 3 and healthy donor PBMCs, retroviral vector was digested with Xba I enzyme to generate 3 kb DNA fragment containing CD137-IRES-GFP gene sequences. Digested DNA was purified using QIAquick PCR purification kit (Qiagen) according to manufacturer instructions. Patient 3 and healthy donor PBMCs were electroporated with 2 $\mu$ g of the digested DNA mixture using Amaxa Human T cell Nucleofector Kit (Lonza), program V-024, according to manufacturer instructions. Transfection efficiency was assessed by GFP expression 24 hours after electroporation.

#### *Statistical Analysis*

Statistical evaluation of experimental data was performed using Prism version 6 (GraphPad Software, USA). Probability (*P*) values < 0.05 were considered statistically

significant. *P* values and statistical tests are indicated in figure legends, where applicable.

### **Supplementary References**

1. Adzhubei I, Jordan DM, Sunyaev SR. Predicting Functional Effect of Human Missense Mutations Using PolyPhen-2. *Current protocols in human genetics / editorial board, Jonathan L Haines [et al]*. 2013 Jan;0 7:Unit7 20.
2. Bryceson YT, Pende D, Maul-Pavicic A, Gilmour KC, Ufheil H, Vraetz T, et al. A prospective evaluation of degranulation assays in the rapid diagnosis of familial hemophagocytic syndromes. *Blood*. 2012 Mar 22;119(12):2754-63.

**Table S1. Clinical and genetic manifestations of CD137-deficient patients**

| Patients                                              | P1                                      | P2                                       | P3                                                                                                                  | P4                                                                                                        | *Pa                                                                | *Pb                                                                          |
|-------------------------------------------------------|-----------------------------------------|------------------------------------------|---------------------------------------------------------------------------------------------------------------------|-----------------------------------------------------------------------------------------------------------|--------------------------------------------------------------------|------------------------------------------------------------------------------|
| <b>Mutation</b>                                       | c.1_545+1716del                         | NM_001561.5:<br>c.452C>T;<br>p.Thr151Met | NM_001561.5:<br>c.101 -1G>A                                                                                         | NM_001561.5:<br>c.100 +1G>A                                                                               | NM_001561.5:<br>c.325G>A<br>p.Gly109Ser                            | NM_001561.5:<br>c.325G>A<br>p.Gly109Ser                                      |
| <b>Initial clinical manifestation</b>                 | abdominal distention                    | recurrent respiratory infections         | lower respiratory tract infection                                                                                   | recurrent infections from childhood                                                                       | sinopulmonary infections, bronchiectasis, pneumococcal septicemia  | recurrent sinopulmonary infections, generalized lymphadenopathy, EBV viremia |
| <b>Age of initial Clinical manifestation</b>          | 2 years                                 | 4 years                                  | 6 years                                                                                                             | 8 years                                                                                                   | 3 years                                                            | 6 years                                                                      |
| <b>Consanguinity</b>                                  | parents are 1st degree cousins          | parents are 1st degree cousins           | parents are 3rd degree cousins                                                                                      | no known consanguinity                                                                                    | parents are 1st degree cousins                                     | parents are 1st degree cousins                                               |
| <b>Infectious complications during disease course</b> | recurrent ear infections<br>EBV viremia | recurrent pneumonia<br>EBV viremia       | recurrent labial herpes,<br>recurrent tonsillitis,<br>recurrent otitis media,<br>recurrent pneumonia<br>EBV viremia | recurrent ear infections,<br>recurrent pneumonia,<br>pleuropneumonia,<br>chronic sinusitis<br>EBV viremia | pneumococcal septicemia<br>sinopulmonary infections<br>EBV viremia | sinopulmonary infections<br>EBV viremia                                      |
| <b>Identified Pathogens</b>                           | CMV, EBV                                | <i>adenovirus</i> , EBV, HSV             | EBV, HSV                                                                                                            | EBV                                                                                                       | <i>streptococcus pneumoniae</i> ,<br>EBV                           | EBV                                                                          |
| <b>Hepatosplenomegaly</b>                             | +                                       | +                                        | +                                                                                                                   | +                                                                                                         | splenomegaly                                                       | splenomegaly                                                                 |
| <b>Lymphadenopathy</b>                                | -                                       | +                                        | +                                                                                                                   | -                                                                                                         | +                                                                  | +                                                                            |
| <b>Malignancy</b>                                     | CD20 positive Burkitt lymphoma          | -                                        | EBV-positive Hodgkin's lymphoma                                                                                     | -                                                                                                         | -                                                                  | EBV-positive Hodgkin's lymphoma, relapse and progression to DLBCL            |

|                                                 |                                                                                                                         |                                                                      |                                                                                                               |                                                                       |                                                                                                                                                           |                                                                                                                                                                                |
|-------------------------------------------------|-------------------------------------------------------------------------------------------------------------------------|----------------------------------------------------------------------|---------------------------------------------------------------------------------------------------------------|-----------------------------------------------------------------------|-----------------------------------------------------------------------------------------------------------------------------------------------------------|--------------------------------------------------------------------------------------------------------------------------------------------------------------------------------|
| <b>Treatment of B-cell malignancies</b>         | cytoreductive prophase treatment: cyclophosphamide, dexamethasone, methotrexate (AA, BB, CC blocks), rituximab          | NA                                                                   | etoposide, doxorubicin, vincristine                                                                           | NA                                                                    | NA                                                                                                                                                        | 5 cycles: doxorubicin, bleomycin, vincristine, etoposide, prednisone, cyclophosphamide along with rituximab; upon relapse daratumumab, bortezomib, dexamethasone and rituximab |
| <b>AIHA</b>                                     | -                                                                                                                       | +                                                                    | +                                                                                                             | -                                                                     | -                                                                                                                                                         | -                                                                                                                                                                              |
| <b>ITP</b>                                      | -                                                                                                                       | +                                                                    | -                                                                                                             | -                                                                     | -                                                                                                                                                         | -                                                                                                                                                                              |
| <b>Other features</b>                           | -                                                                                                                       | ALPS like symptoms, EBV associated lymphoproliferation               | short stature                                                                                                 | distal peptic esophagitis, erythematous gastritis                     | hemophagocytic lymphohistiocytosis                                                                                                                        | -                                                                                                                                                                              |
| <b>Treatment of immunodeficiency/Infections</b> | IVIG, co-trimoxazole, fluconazole                                                                                       | sirolimus, cellcept, co-trimoxazole                                  | IVIG, antibiotic prophylaxis                                                                                  | SCIg                                                                  | IVIG, rituximab                                                                                                                                           | IVIG                                                                                                                                                                           |
| <b>Outcome</b>                                  | responded well to chemotherapy treatment protocol and rituximab, currently stable under IVIG and antibiotic prophylaxis | well on cellcept treatment and co-trimoxazole antibiotic prophylaxis | good response to chemotherapy with clinical remission. Currently stable under IVIG and antibiotic prophylaxis | stable under SCIg replacement treatment with resolution of infections | sinopulmonary infections improved upon IVIg treatment, resolution of viremia with rituximab. Currently undergoing HSCT from a healthy HLA-matched sibling | clinical remission and resolution of viremia with chemotherapy and rituximab treatment. Respiratory tract infections improved with IVIg treatment                              |

CMV: Cytomegalovirus. EBV: Epstein-Barr virus. HSV: Herpes simplex virus. NA: Not applicable. AIHA: Autoimmune hemolytic anemia. ITP: Immune thrombocytopenic purpura.

ALPS: Autoimmune lymphoproliferative syndrome. IVIG: Intravenous immunoglobulin. SCIg: Subcutaneous immunoglobulin. HSCT: hematopoietic stem cell transplantation.

DLBCL: diffuse large B cell lymphoma.

\*Pa, Pb reported by Alosaimi et al. *J Allergy Clin Immunol*, 2019.

**Table S2. Immunologic characteristics of patients with CD137 deficiency**

| Variable                                           | Patient 1   |                 | Patient 2   |                 | Patient 3   |                 | Patient 4   |                 |
|----------------------------------------------------|-------------|-----------------|-------------|-----------------|-------------|-----------------|-------------|-----------------|
|                                                    | Value       | Reference Range |
| Age of evaluation                                  | 4 years     |                 | 9 years     |                 | 11 years    |                 | 33 years    |                 |
| Absolute lymphocyte count (cells/mm <sup>3</sup> ) | 3390        | 2340-5028       | 3597        | 1300-5000       | 1590        | 1300-3000       | 2680        | 1200-4100       |
| <i>Lymphocyte subset</i>                           |             |                 |             |                 |             |                 |             |                 |
| CD3+ (cells/mm <sup>3</sup> )                      | 1551        | 1239-2611       | 2950        | 700-4200        | 1272        | 1000-2000       | 1860        | 780-3000        |
| CD4+ (cells/mm <sup>3</sup> )                      | 1074        | 870-2144        | 1295        | 600-2100        | 858         | 500-1300        | 965         | 100-2300        |
| CD45RO+ CCR7+ (%)                                  | <b>7.5</b>  | 13.88-48.12     | <b>14.6</b> | 22.06-46.46     | 45.5        | 24.24-52.73     | <b>11.5</b> | 18-95           |
| CD45RO+ CCR7- (%)                                  | <b>78.7</b> | 0.94-6.46       | <b>59.3</b> | 2.08-8.78       | <b>26.5</b> | 3.4-11.17       | <b>55.8</b> | 1-23            |
| CD45RO- CCR7+ (%)                                  | <b>11.6</b> | 46.14-84.4      | <b>22</b>   | 45.56-75.28     | <b>24.5</b> | 39.72-69.59     | <b>27</b>   | 16-100          |
| CD45RO- CCR7- (%)                                  | 1.1         | 0-1.36          | 0.1         | 0-1.06          | <b>2.43</b> | 0.1-1.29        | 5.7         | 0-6.8           |
| CD8+ (cells/mm <sup>3</sup> )                      | <b>407</b>  | 472-1107        | <b>1439</b> | 200-1100        | 333         | 300-800         | 772         | 200-1200        |
| CD45RO+ CCR7+ (%)                                  | <b>0.9</b>  | 5.18-31.66      | <b>3.4</b>  | 12.08-30.54     | <b>4.9</b>  | 13.21-37.89     | 7.3         | 1-20            |
| CD45RO+ CCR7- (%)                                  | <b>62.4</b> | 0.7-11.22       | <b>43.3</b> | 1.58-13.18      | 15.2        | 1.53-15.39      | 29.3        | 14-98           |
| CD45RO- CCR7+ (%)                                  | <b>3.8</b>  | 36.8-83.16      | <b>34.8</b> | 41.58-77.9      | <b>77.1</b> | 41.41-73.04     | 23.7        | 41.41-73.04     |
| CD45RO- CCR7- (%)                                  | 29.7        | 0.84-33.02      | 15.3        | 1.7-24.62       | 2.79        | 2.01-21.65      | 36.2        | 2.01-21.65      |
| CD3-CD16+CD56+ (cells/mm <sup>3</sup> )            | 176         | 155-565         | <b>54</b>   | 120-483         | <b>76</b>   | 100-700         | 417         | 90-600          |
| CD19+ (cells/mm <sup>3</sup> )                     | 846         | 434-1274        | <b>360</b>  | 50-300          | 238         | 200-500         | 278         | 100-500         |
| IgD+ CD27- (%)                                     | <b>93</b>   | 73-89           | <b>94.6</b> | 67.8-89         | <b>93.7</b> | 67.8-89         | <b>95.5</b> | 58-72.1         |
| IgD+ CD27+ (%)                                     | <b>2.2</b>  | 5.7-14.3        | <b>2.1</b>  | 5-16.2          | <b>1.83</b> | 5-16.2          | <b>1.9</b>  | 13.4-21.4       |
| IgD- CD27+ (%)                                     | <b>1.2</b>  | 3-10.3          | <b>0.9</b>  | 4-14            | <b>0.79</b> | 4-14            | <b>1.8</b>  | 9.2-18.9        |
| CD27+ CD38+ (%)                                    | 0.76        | 0.5-7.06        | <b>0.70</b> | 0.9-7.36        | <b>0.37</b> | 0.7-5.67        | <b>0.61</b> | 0.9-7.36        |

| <i>Immunoglobulins</i>    |                      |            |                                      |            |                                                                         |           |                   |          |
|---------------------------|----------------------|------------|--------------------------------------|------------|-------------------------------------------------------------------------|-----------|-------------------|----------|
| IgG (mg/dL)               | <b>413</b>           | 701-1157   | <b>1599</b>                          | 540-1550   | <b>2290</b>                                                             | 824-1300  | <b>550</b>        | 968-2514 |
| IgM (mg/dL)               | 105                  | 42-80      | <b>714</b>                           | 40-240     | <b>267</b>                                                              | 44-142    | <b>33.6</b>       | 103-397  |
| IgA (mg/dL)               | 68.7                 | 34-108     | <b>49</b>                            | 52-274     | 130                                                                     | 71-161    | <b>31</b>         | 103-397  |
| IgE (IU/mL)               | 26.4                 | 2-199      | 0                                    | 0-200      | 7.77                                                                    | <100      | 173               | 116-551  |
| <i>Complement</i>         |                      |            |                                      |            |                                                                         |           |                   |          |
| C3(mg/dL)                 | N/A                  |            | <b>68.9</b>                          | 90-180     | 105                                                                     | 90-180    | N/A               |          |
| C4(mg/dL)                 | N/A                  |            | <b>72.4</b>                          | 10-40      | <b>9.3</b>                                                              | 10-40     | N/A               |          |
| <i>T-cell repertoire</i>  |                      |            |                                      |            |                                                                         |           |                   |          |
| αβ+ (%)                   | 94                   |            | 79                                   |            | 83                                                                      |           | 95.3              |          |
| γδ+ (%)                   | <b>2</b>             | 4.94-17.98 | <b>2</b>                             | 6.92-19.84 | <b>1.1</b>                                                              | 8.1-20.76 | 3.5               |          |
| TRECs                     | N/A                  |            | 800                                  | >400       | N/A                                                                     |           | N/A               |          |
| <i>Auto-immune workup</i> |                      |            |                                      |            |                                                                         |           |                   |          |
| Positive auto-antibodies  |                      |            | ANA positive (1:180)                 |            | d. Coombs positive                                                      |           |                   |          |
| <i>EBV/CMV status</i>     |                      |            |                                      |            |                                                                         |           |                   |          |
| EBV DNA Viral Load (PCR)  | <b>652 copies/ml</b> |            | <b>7.1 X10<sup>5</sup> copies/ml</b> |            | <b>9.1 X10<sup>4</sup> IU/ml</b>                                        |           | <b>610 Geq/ml</b> |          |
| CMV DNA Viral Load (PCR)  | <b>82 copies/ml</b>  |            | negative                             |            | NA                                                                      |           | negative          |          |
| EBV Serology              | NA                   |            | EBNA-1 (IgG): positive               |            | *EBNA-1 (IgG): positive<br>*VCA (IgM): negative<br>*VCA (IgG): positive |           | NA                |          |

|                                  |                                                |                                                             |                                                                                                      |                                                                                                                     |
|----------------------------------|------------------------------------------------|-------------------------------------------------------------|------------------------------------------------------------------------------------------------------|---------------------------------------------------------------------------------------------------------------------|
| CMV Serology                     | NA                                             | anti-CMV (IgG): negative                                    | *anti-CMV (IgM): <b>2.44</b><br>(>1.1 U/ml)<br>*anti-CMV (IgG): positive<br>avidity = 0.837 positive | NA                                                                                                                  |
| <i>Common vaccine serologies</i> |                                                |                                                             |                                                                                                      |                                                                                                                     |
| Rubella Serology                 | &anti-rubella (IgG): 101.3<br>IU/ml (positive) | MMRV serology (IgG):<br>positive                            | anti-rubella (IgG): 59.3<br>IU/ml (positive)                                                         | *anti-rubella (IgG): <b>0.94</b><br><b>uL/mL (negative)</b><br>Sister: anti-rubella (IgG):<br>15.2 uL/mL (positive) |
| Varicella Serology               | &anti-VZV (IgG): 1141<br>IU/ml (positive)      |                                                             | NA                                                                                                   | NA                                                                                                                  |
| Hepatitis Serology               | &anti-HBs (IgG): 201.4<br>uL/ml (positive)     | anti-HAV (IgG): positive<br>anti-HBs (IgG): <b>negative</b> | NA                                                                                                   | NA                                                                                                                  |
| Tetanus Serology                 | &anti-tetanus (IgG): 2.8<br>U/ml (positive)    | NA                                                          | anti-tetanus (IgG): 2.8<br>U/ml (positive)                                                           | NA                                                                                                                  |

Listed are reference ranges or laboratory values for the patient's age group. Abnormal values in **bold**.

CMV Cytomegalovirus; EBNA Epstein Barr Nuclear Antigen; EBV Epstein Barr Virus; HAV Hepatitis A virus; HBV Hepatitis B virus; MMRV Measles, Mumps, Rubella, Varicella; NA Not Applicable; VCA Viral-Capsid Antigen; VZV Varicella Zoster Virus.

\*Prior to IVIg / SCIg replacement therapy; &On IVIg replacement therapy



**Table S3. Summary of homozygous autosomal recessive mutations in patients**

| Patient | Gene           | Chromosome | Position        | Reference | Variant in patient | Mutation type        | Protein variant in patient |
|---------|----------------|------------|-----------------|-----------|--------------------|----------------------|----------------------------|
| 1       | <i>ZXDB</i>    | X          | 57620724        | T         | A                  | MISSENSE             | p.Val748Asp                |
| 1       | <i>TNFRSF9</i> | 1          | 7995072-8000054 | NA        | NA                 | DELETION             | NA                         |
| 1       | <i>PARK7</i>   | 1          | 8022845-8031023 | NA        | NA                 | DELETION             | NA                         |
| 2       | <i>XIST</i>    | X          | 73048904        | A         | G                  | SPLICE REGION        | NA                         |
| 2       | <i>AFF2</i>    | X          | 148048444       | C         | T                  | MISSENSE             | p.Thr1013Met               |
| 2       | <i>TNFRSF9</i> | 1          | 7995165         | C         | T                  | MISSENSE             | p.Thr151Met                |
| 2       | <i>METTL18</i> | 1          | 169763046       | C         | A                  | SPLICE REGION        | NA                         |
| 2       | <i>GPC1</i>    | 2          | 241375361       | GGCT      | G                  | DELETION             | p.Leu11del                 |
| 2       | <i>DNAH5</i>   | 5          | 13794053        | G         | A                  | MISSENSE             | p.Gly2668Arg               |
| 2       | <i>CD36</i>    | 7          | 80293747        | A         | G                  | MISSENSE             | p.Tyr212Cys                |
| 3       | <i>ASB12</i>   | X          | 63445095        | C         | G                  | MISSENSE             | p.Ala146Pro                |
| 3       | <i>TNFRSF9</i> | 1          | 7998889         | C         | T                  | SPLICE SITE ACCEPTOR | NA                         |
| 3       | <i>HS6ST1</i>  | 2          | 129075797       | A         | C                  | MISSENSE             | p.Val114Gly                |
| 3       | <i>IRX4</i>    | 5          | 1880839         | C         | T                  | MISSENSE             | p.Arg136Lys                |
| 3       | <i>ZNF808</i>  | 19         | 53058034        | C         | T                  | MISSENSE             | p.Pro622Leu                |
| 4       | <i>TNFRSF9</i> | 1          | 799954          | G         | A                  | SPLICE SITE DONOR    | NA                         |

Inclusion criteria:

CADD more than 15

SIFT deleterious

Polyphen probably\_damaging

**Table S4. Predicted impact scores of *CD137* variants**

| Patient | Mutation        | Chromosome | Position        | PolyPhenCat       | SIFTcat     | CADD |
|---------|-----------------|------------|-----------------|-------------------|-------------|------|
| 1       | c.1_545+1716del | 1          | 7995072-8000054 | NA                | NA          | NA   |
| 2       | c.452C>T        | 1          | 7995165         | Probably_damaging | Deleterious | 24.9 |
| 3       | c.101 -1G>A     | 1          | 7998889         | NA                | NA          | 27   |
| 4       | c.100 +1G>A     | 1          | 799954          | NA                | NA          | 25   |

## Supplementary Figures legends

Figure S1. Clinical features, radiology, pathology, T cell clonality. (A) Coronal T2-HASTE image (Patient 1) demonstrating multiple hypointense metastatic renal cortical masses (black arrows). A mass lesion is observed on the right paraspinal area infiltrating the adjacent paravertebral muscle (red arrow). (B) Chest CT scan demonstrating consolidation in the anterior aspect of the right middle lobe (RML), nodular opacity in the lingula and posterior mediastinal adenopathy (Patient 2). (C) Coronal reconstructions of a follow-up CT four months later demonstrating ground glass opacities in both lungs (Patient 2). (D) Splenomegaly (Patient 2) shown in coronal reconstruction of CT scan. (E) CT scan of the upper neck showing cervical lymphadenopathy (Patient 2). (F) Contrast enhanced computerized tomography (CT) demonstrating mediastinal and axillary lymphadenopathy (Patient 2). (G) Coronal reconstruction of Positron Emission Tomography showing increased uptake in the cervical, axillary and mediastinal lymph nodes. An infiltrate in the right middle lobe (RML) is demonstrated. (H) TCR-gamma spectratyping of lymph node biopsy (Patient 2) revealing two dominant peaks, supporting the presence of a monoclonal T-cell population. (I) In situ hybridization for EBV-encoded small RNAs (EBER) displaying numerous positive cells (Patient 2). Sections used are from right inguinal lymph node tissue. (J) Abdominal CT scan (Patient 3) demonstrating hepatomegaly. (K) MR demonstrating chronic sinusitis in Patient 4 with obstruction in Lt. sinus.

Figure S2. Genetic analysis. Sanger sequencing chromatograms confirming the WES findings in Family B, Family C and Family D. For Family A, WES reads in Patient 1 are compared to a healthy control showing no NGS coverage for several exons of *TNFRSF9* and *PARK7*.

Figure S3. *TNFRSF9* sequence homology in species. *TNFRSF9* sequence alignment showing the conservation of amino acid threonine at position 151 across eight species (red frame). The variant in Patient 2 (p.Thr151Met) is stated.

Figure S4. Effect of variants in the patients. (A) (upper left) Amplified gDNA utilizing forward and reverse primers to amplify exon 6 in *TNFRSF9* for Family A and controls, depicting the genomic deletion in patient 1 (AII-1) and brother (AII-2). Full length cDNA of Patient 3 (CII-2) (upper middle panel) and Patient 4 and sister (DII-1) (upper right panel) were amplified and loaded on agarose gels, depicting smaller sized bands. \* and \*\* in middle panel depicts two aberrantly spliced transcripts. (B) Schematic illustration showing the consequences for the splice site variants in Patient 3 and Patient 4. cDNA sequencing results revealed a skipping of exon 2 in Patient 4, and a skipping of exons 3 and 6 for Patient 3. (C) Chromatograms of Sanger sequencing of the PCR product marked \* and \*\* in figure A showing skipping of exon 3 and exons 3 and 6 in P3.

Figure S5. CD137 expressions. Flow-cytometric expression of CD137 in unstimulated and anti-CD3/CD28 stimulated T-cells for patients, siblings and healthy donors (HDs) are shown.

Figure S6. (A) Peripheral blood B-cell immunophenotyping: Memory (CD19<sup>+</sup>CD20<sup>+</sup>CD27<sup>+</sup>), class-switched (CD19<sup>+</sup>CD20<sup>+</sup>CD27<sup>+</sup>IgD<sup>-</sup>) and transitional B-cell (CD19<sup>+</sup>CD38<sup>+</sup>IgM<sup>+</sup>) frequencies are compared in patients and siblings, measured by flow-cytometry. (B) Peripheral blood T-cell immunophenotyping: Follicular helper T-cell (T<sub>FH</sub>) frequencies are shown in patients and siblings, measured by flow-cytometry.

Figure S7. CD137 and CD137L inhibition in T-cell function. (A) Effect of CD137 blockade on proliferation of T-cells in healthy donors (HDs). Anti-CD137 monoclonal neutralizing antibody (BBK-2 clone) or isotype control was added to anti-CD3 stimulation at increasing concentrations showing a dose dependent inhibition of T-cell proliferation (as

measured by VPD450 dilution). Error bars indicate  $\pm$  SEM. (B) T-cell activation (CD25 expression): Flow-cytometric expression of CD25<sup>+</sup> is depicted in patients and HDs upon 96 hour stimulation with anti-CD3, anti-CD3+CD137L and anti-CD3+CD28. (C) Restoration of T-cell activation upon CD137 expression. CD137 expression, CD25 T-cell activation and rate of proliferated T cells (stimulated with anti-CD3) upon exogenous expression of wild-type CD137 are shown in Patient 3. (D) *TNFSF9* mRNA expression (top panel) and CD137L surface expression (bottom panel) was measured in unstimulated and anti-CD3+anti-CD28 stimulated T-cells. *HPRT* was used as a control.

Figure S8. Cytotoxicity, degranulation and T cell receptor mediated signaling. (A) EBV-specific CTL cytotoxicity measured by the percentage of specific lysis of autologous EBV B-LCL target cells by their respective CD8<sup>+</sup> T-cells at different effector to target ratios. Patient CTL cytotoxicity showed significant reduction compared to HDs (\* *P* value<0.05, Two-way ANOVA). (B) CTL degranulation (CD107a) was measured in stimulated CD8<sup>+</sup> T-cells by flow cytometry. (C) NK-cell degranulation in patients and HDs is compared in unstimulated and stimulated PBMCs, measured by flow-cytometry. (D) Immunoblotting showing expression of I $\kappa$ B $\alpha$ , phospho-p65, total p65, phospho-AKT and total AKT upon anti-CD3+CD28 stimulation in expanded T cells. HSP90 was used as a loading control. Intracellular phospho-AKT and NF- $\kappa$ B1 phospho-p65 levels in unstimulated and stimulated T-cell blasts, measured by flow cytometry. (E) MAPK signaling is shown measured by immunoblotting. Immunoblotting expression of total ERK1/2 and phospho-ERK1/2 upon anti-CD3+CD28 stimulation in expanded T-cells. HSP90 was used as a loading control. Intracellular phospho-ERK levels in unstimulated and stimulated peripheral CD4<sup>+</sup> and CD8<sup>+</sup> T-cells is depicted, measured by flow cytometry.

Figure S9. *In vitro* plasmablast differentiation. (A) Plasmablast (CD3<sup>-</sup>CD19<sup>+</sup>CD27<sup>+</sup>CD38<sup>+</sup>) frequencies are shown in unstimulated PBMCs and upon 96 hour stimulation with CpG,

CD40L+IL4 and CD40L+IL21, showing a significant difference between HDs and Patients. (\*  $P$  value<0.05, \*\*  $P$  value<0.01, \*\*\*\*  $P$  value<0.0001, Two-way ANOVA). (B) CD137L expression in CD19<sup>+</sup> B-cells upon CpG stimulation measured by flow cytometry, showing expression of CD137L in both HD and Patient 3 stimulated cells.

Figure S10. Naïve B-cell function. Naïve B-cells (CD19<sup>+</sup>CD3<sup>-</sup>IgD<sup>+</sup>CD27<sup>-</sup>) were sorted and B-cell functions were assessed in our patients. (A) CD86<sup>+</sup> B-cell activation was measured 1 day post-stimulation with CpG, showing reduced B-cell activation in P3 and P4. (B) naïve B-cell proliferation measured by violet proliferation dye (VPD450) 5 days post-stimulation showing reduced rate of proliferating B-cells in P3 and P4 in response to T-cell dependent (CD40L + IL21) and independent (CpG) stimuli. (C) Class switch recombination in sorted naïve B-cells. Gating of class switched IgG<sup>+</sup> and IgA<sup>+</sup> of sorted naïve B-cells upon CD40L + IL21 and CpG stimuli, depicted reduced CSR in P3 and P4. (D) Reduced memory B cells rates in P2 and P4 upon CpG stimulation of sorted naïve B-cells.

# Supplementary Figure 1

Clinical Features, radiology, pathology, T-cell clonality

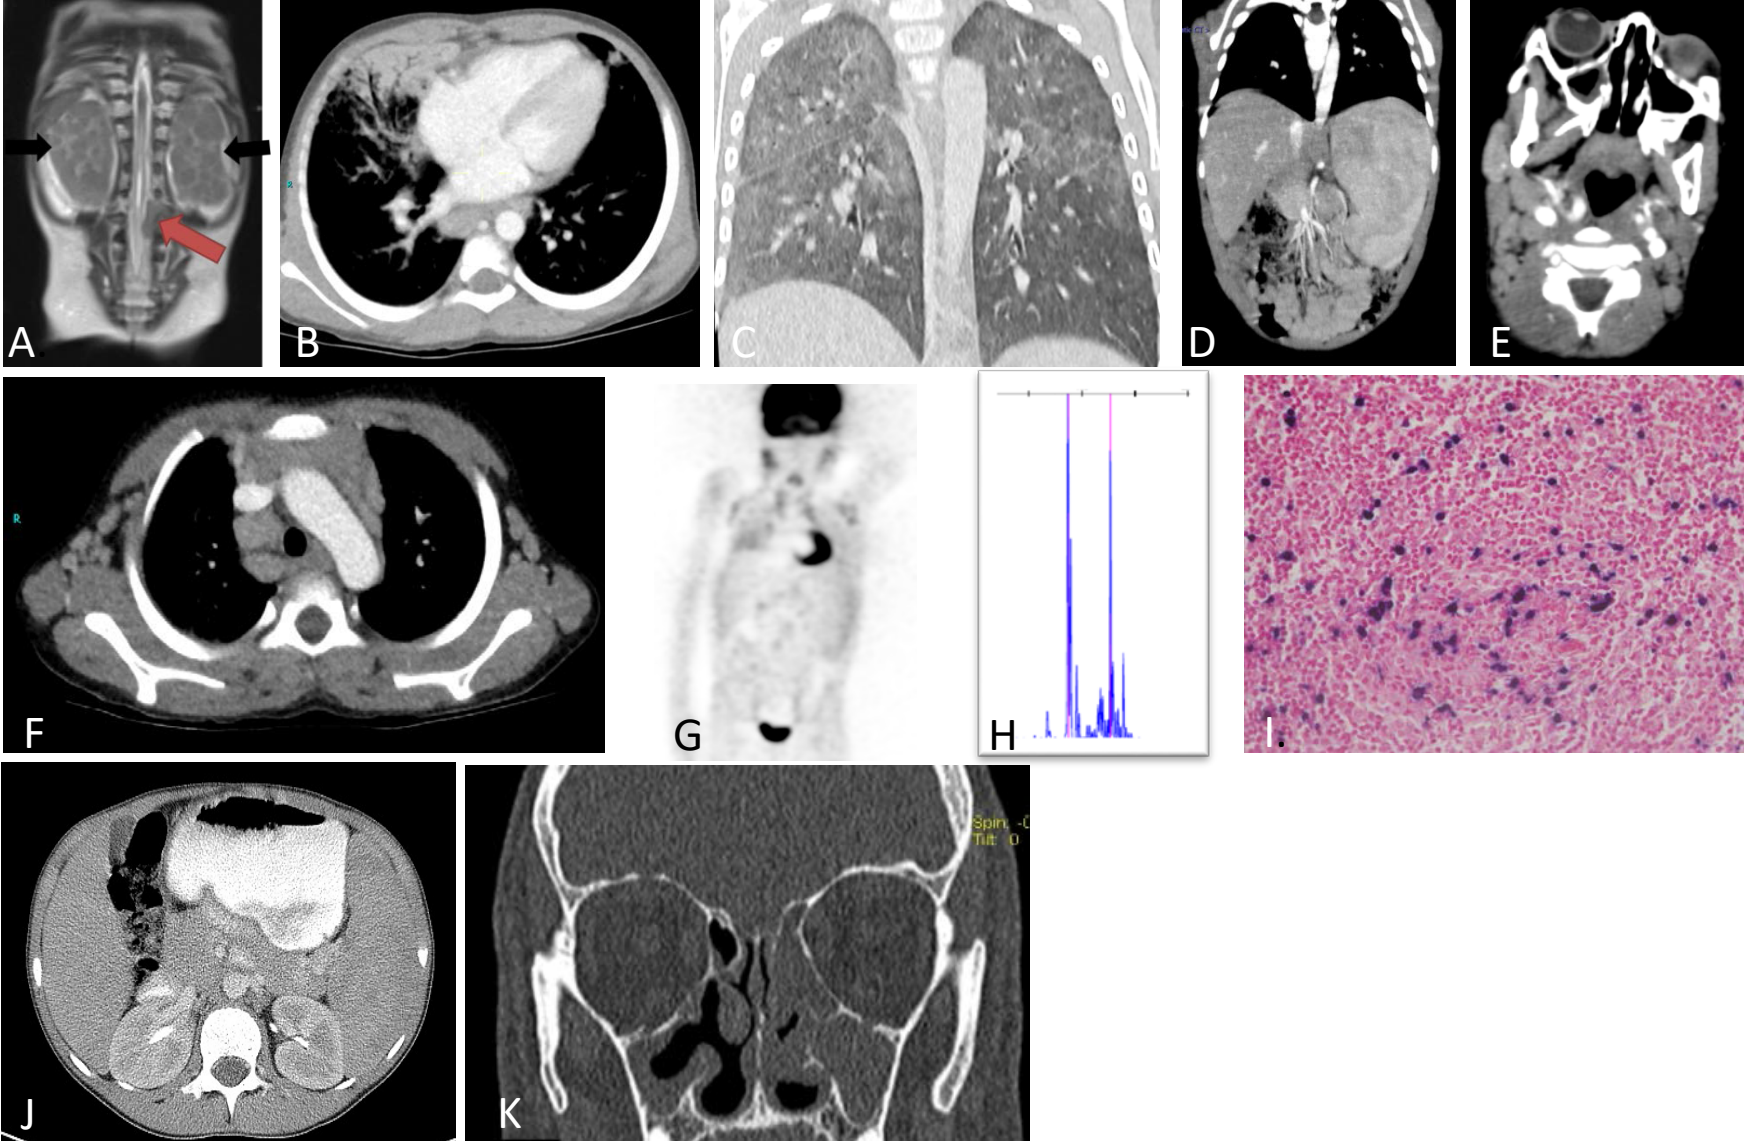

Supplementary Figure 2

Genetic analysis

Family A

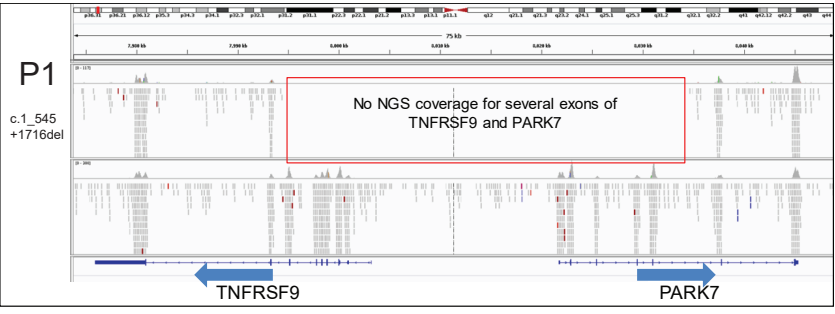

Family B

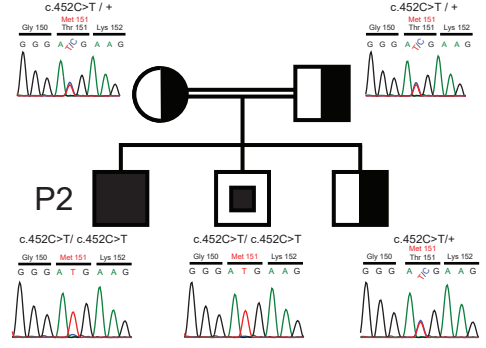

Family C

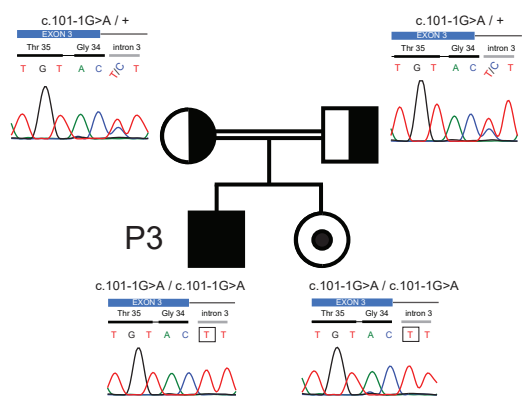

Family D

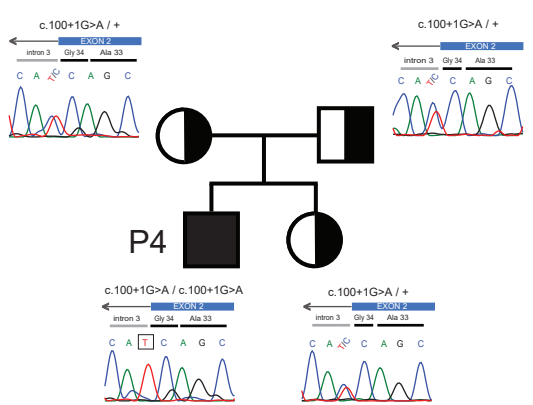



## Supplementary Figure 3

*TNFRSF9* sequence homology in species

p.Thr151Met

|                  |                                                                                                                         |
|------------------|-------------------------------------------------------------------------------------------------------------------------|
| hs (human)       | LTKK <b>GCKDC</b> CFGTENDQK-RGIC <b>RPWT</b> NCSLDGKSVLVNGT <b>KERD</b> VVCGPSPAD---LSPGAS-SVT--- 173                   |
| mm (mouse)       | LTK <b>Q</b> GCKTCSL <b>GT</b> ENDQNGTGVCR <b>PWT</b> NCSLDGRSVLKT <b>GT</b> TEKDVVCGPPVVS---FSPSTT-ISV--- 173          |
| bt (cattle)      | LTNE <b>GCKDC</b> SFGTENDQE-HGIC <b>RPWT</b> DCSLNGKAVLVNGT <b>KESD</b> VVCGPPSSD---FSPGAS-STI--- 172                   |
| gg (chicken)     | KTG <b>SGCQA</b> CRYGTENDQP-DG <b>SCR</b> NWTVCS--ENQVLEPGTATKDVVCKPSSDN---PTLATT-LPT--- 171                            |
| tg (zebra finch) | RTRNGC <b>QA</b> CRYGTENDQP-NG <b>SCR</b> NWIMCS--GNQVLEPGT <b>PA</b> RDVICKDASVN---FTSVTT-IPT--- 182                   |
| am (alligator)   | LIGT <b>GCET</b> CPWGTENNQS-DG <b>FCK</b> RWTKCS--GDEV <b>LKQ</b> GTSTSDVICSHMSGs---LAPPAS---T--- 171                   |
| xl (clawed frog) | IREQ <b>KCTD</b> CP <b>SGTE</b> KPGG-ES <b>KCR</b> PWIKCPI-GVKV <b>VL</b> NGT <b>RTS</b> DVICGDAVSHTTEPT-STTSNRVTQR 189 |
| dr (zebra fish)  | PKGR <b>VCGQ</b> CP <b>EGK</b> ESDKI-H <b>STC</b> REWTKSSCPDGYKL <b>KK</b> GNLTS <b>DST</b> CIPPP-----SSS-VRT--- 184    |

Supplementary Figure 4  
Effects of variants in the patients

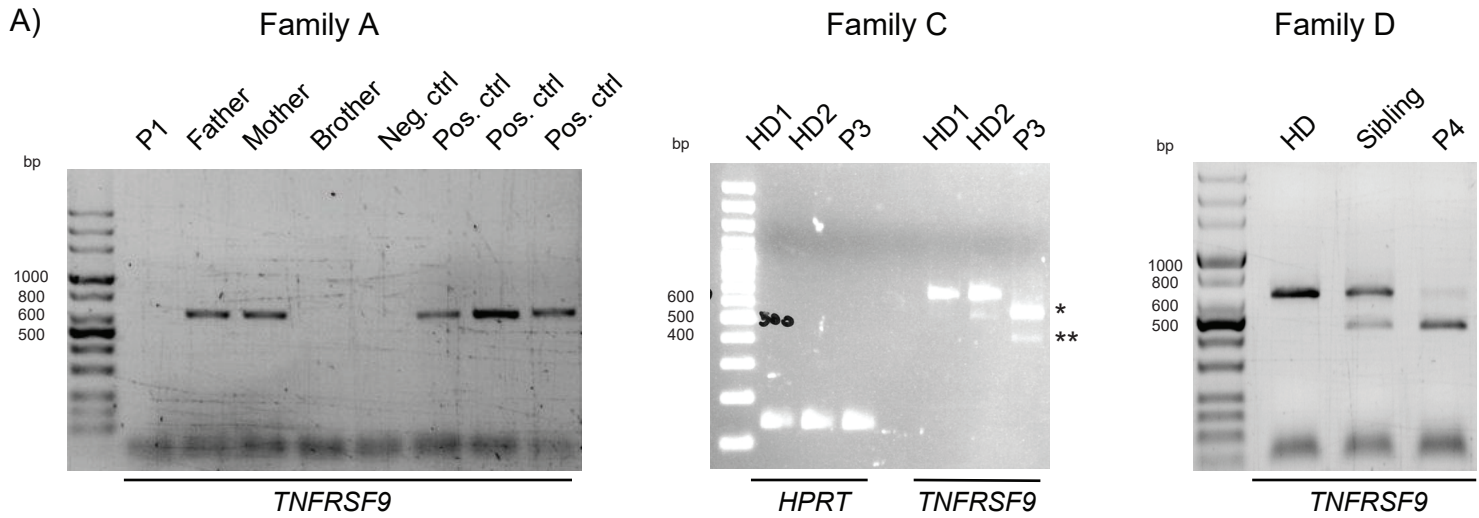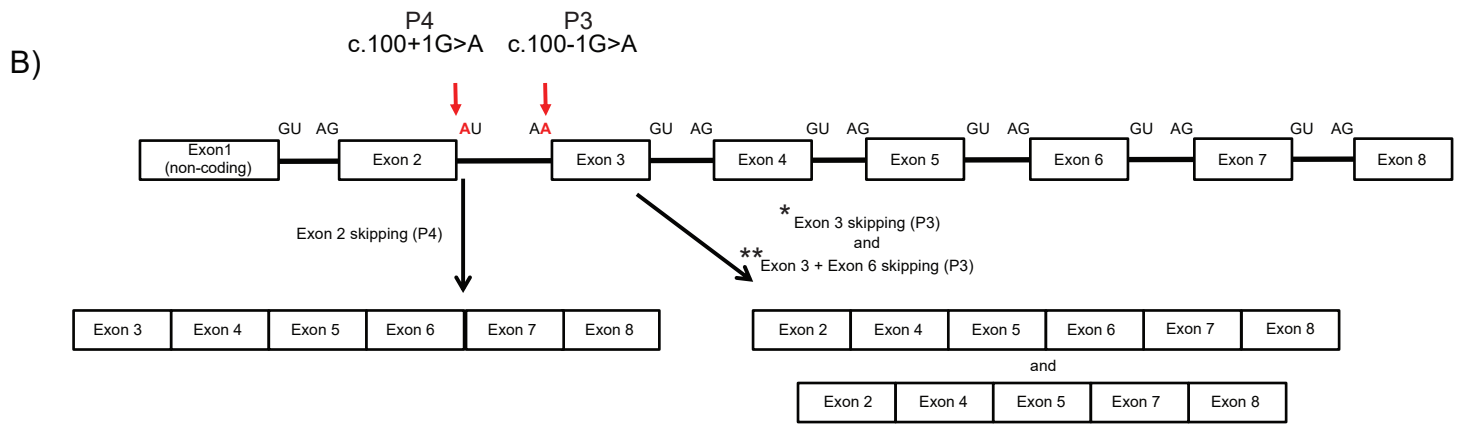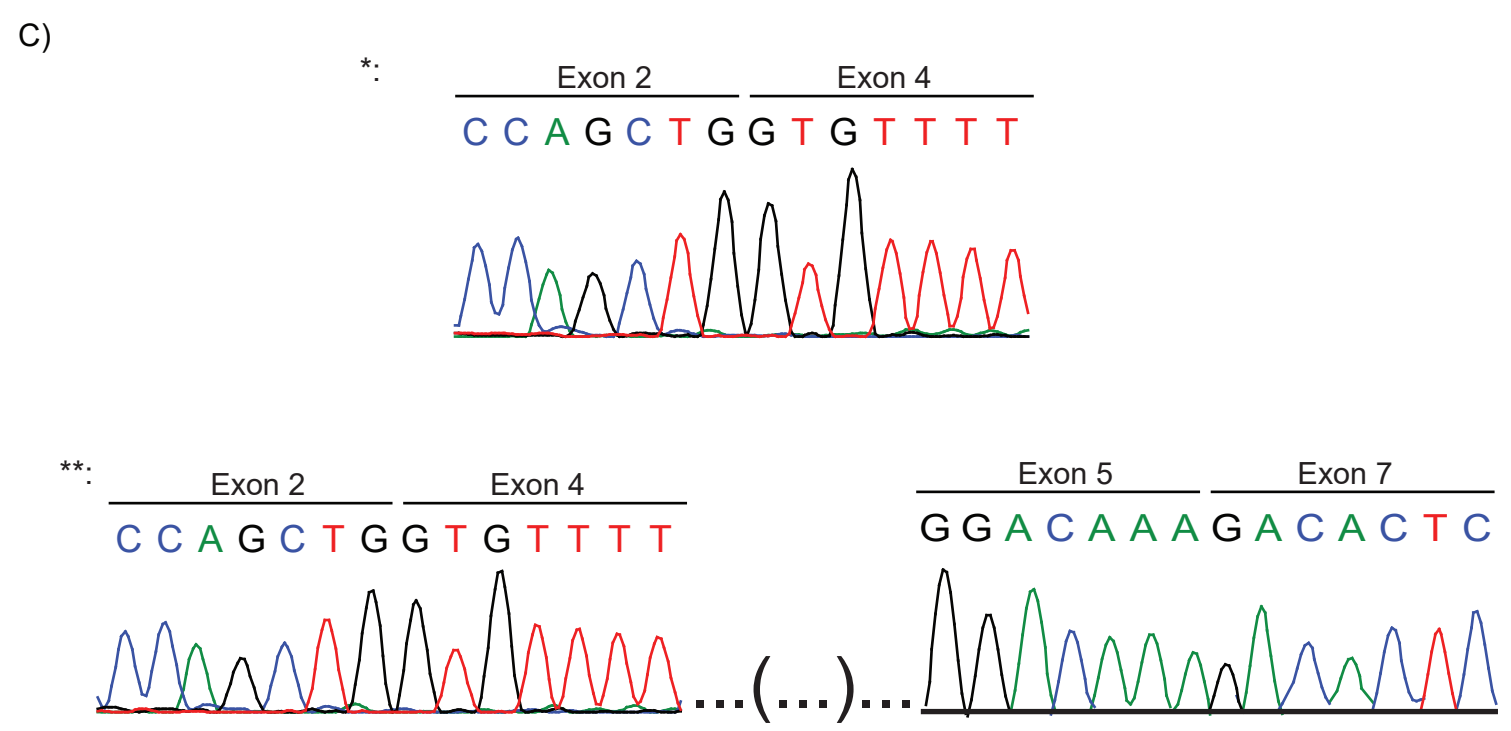

# Supplementary Figure 5

## CD137 expression

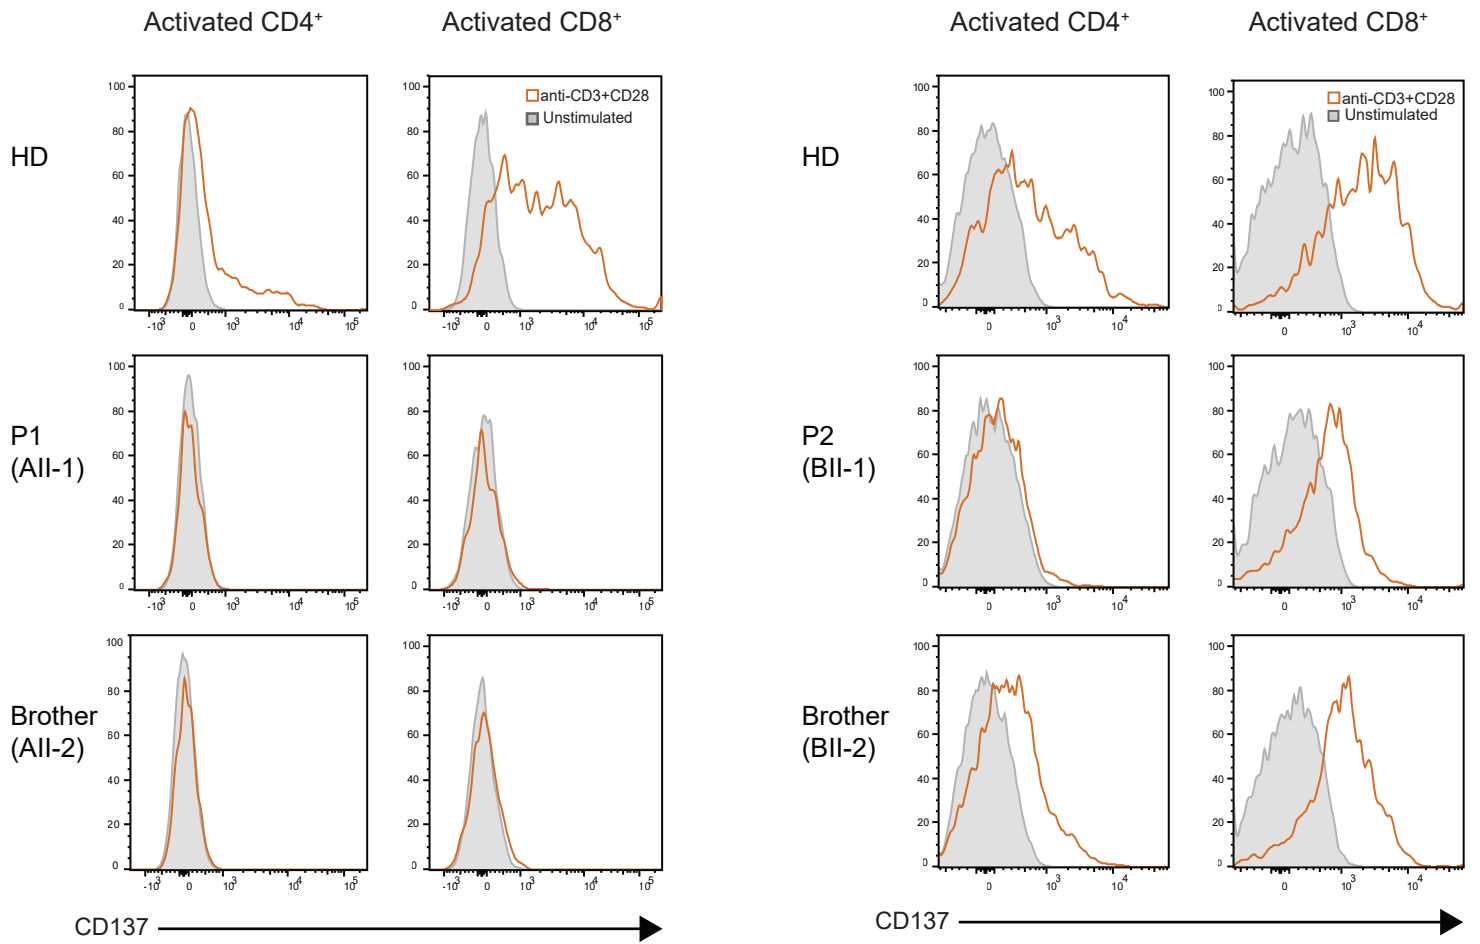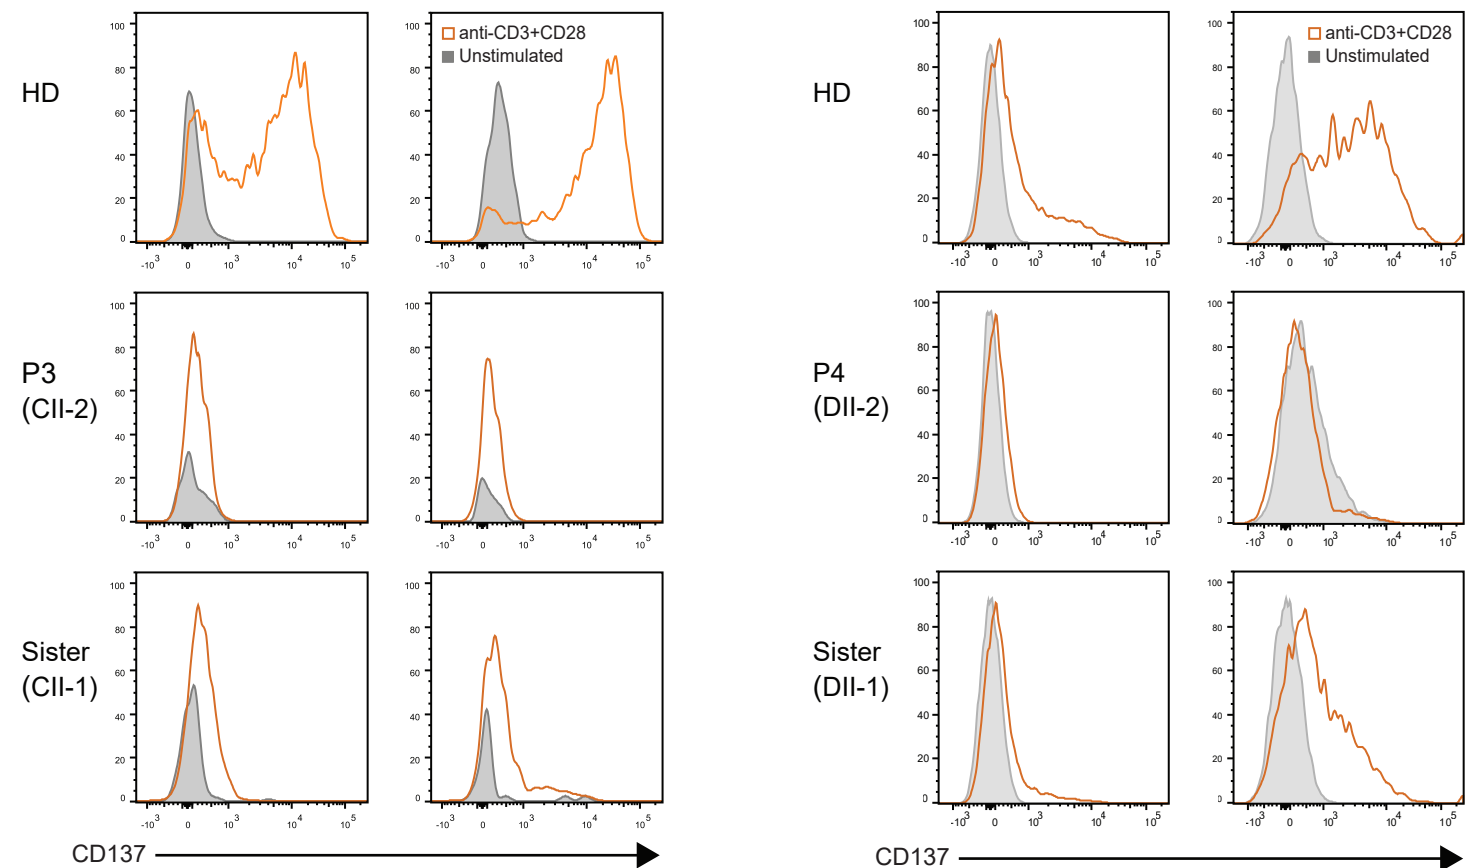

# Supplementary Figure 6a

## Peripheral blood B-cell immunophenotyping

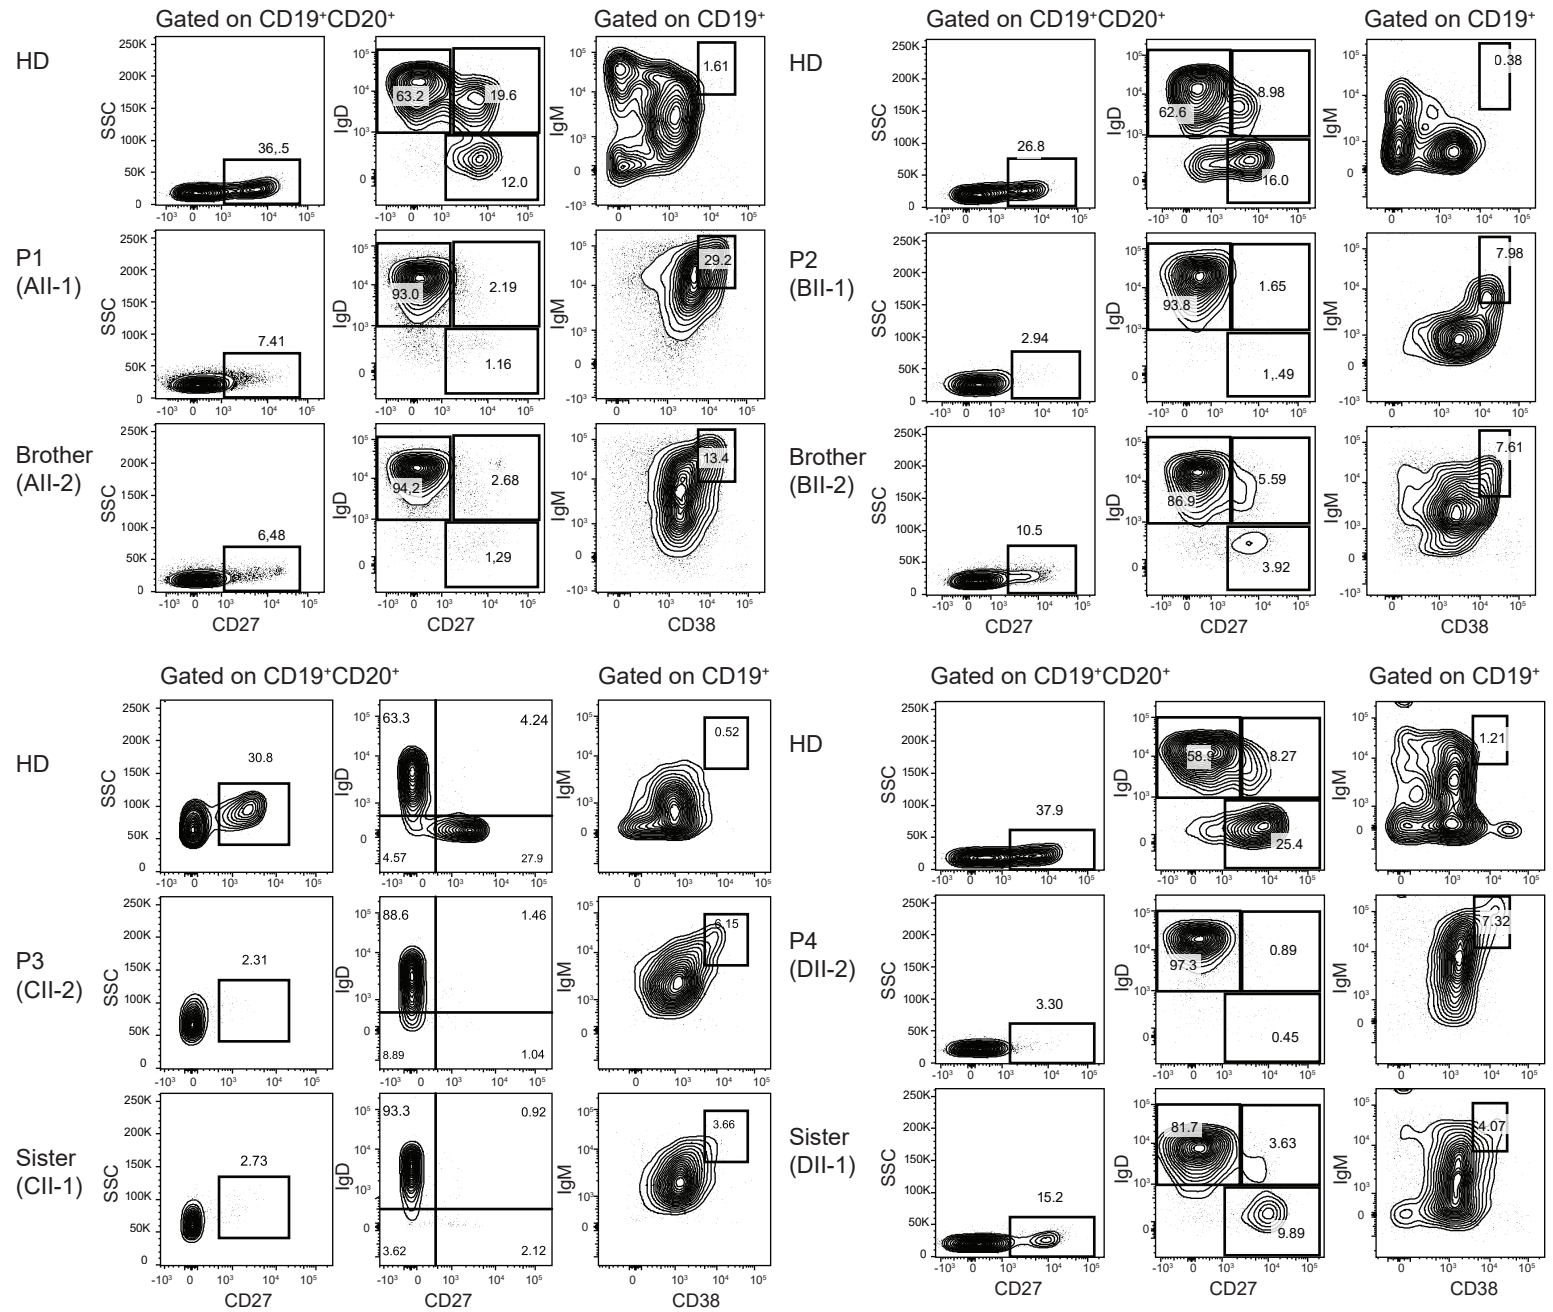

# Supplementary Figure 6b

## Peripheral blood T-cell immunophenotyping

### Follicular helper T-cells ( $T_{FH}$ )

Gated on  $CD3^+CD4^+$

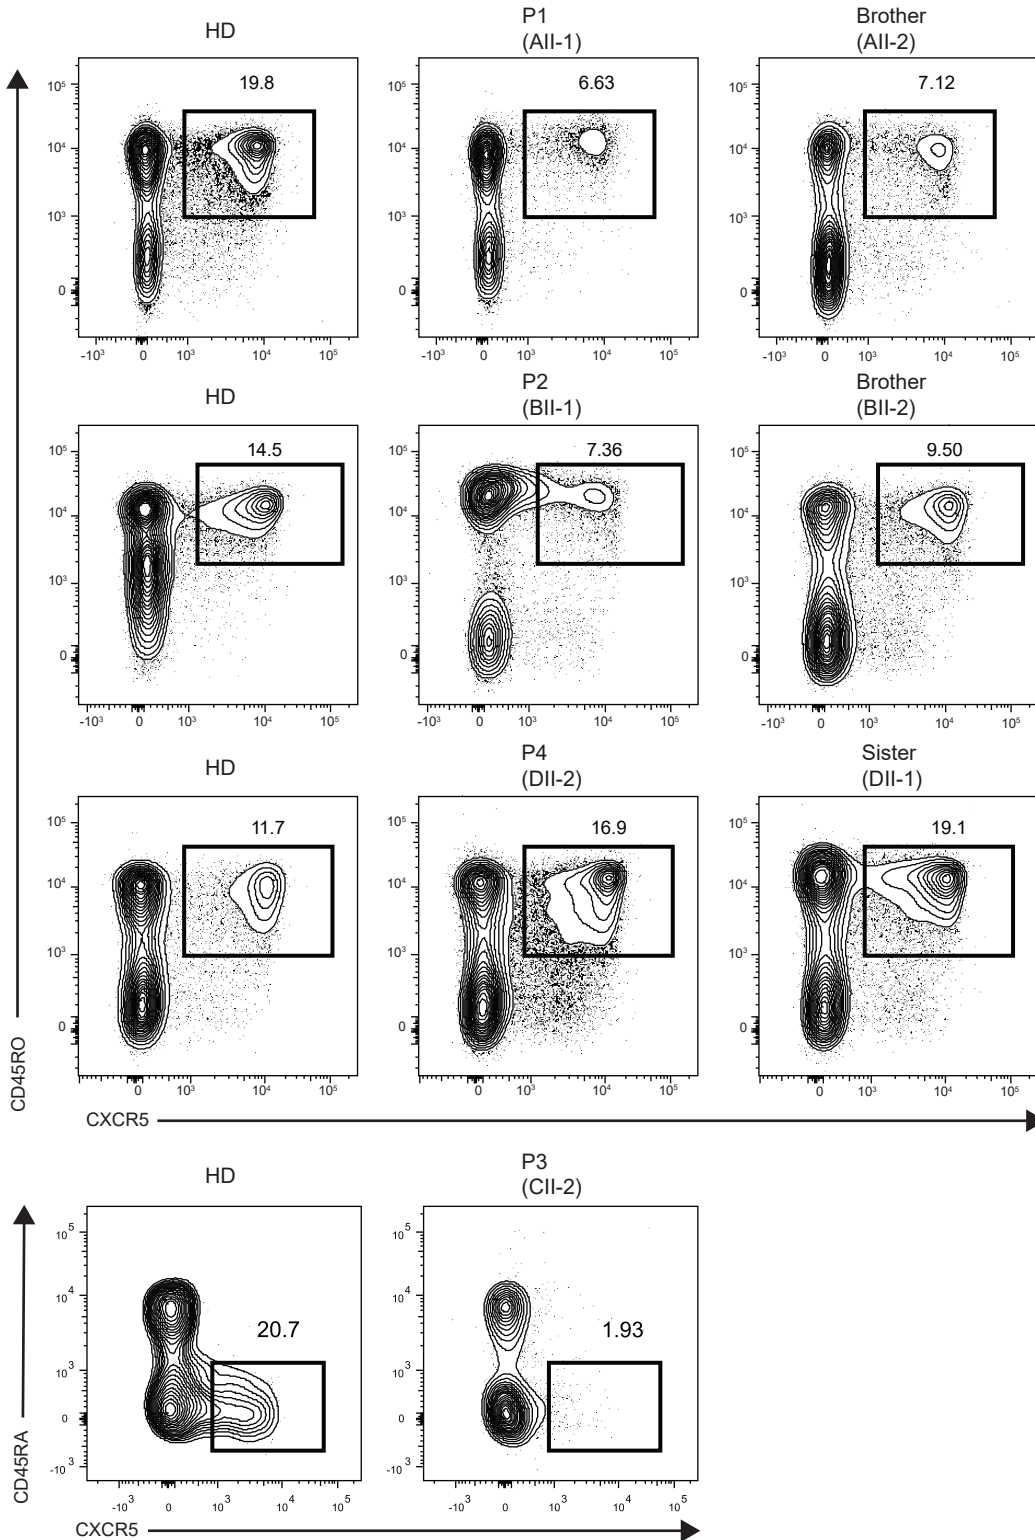

# Supplementary Figure 7

## A Blocking CD137 in HD T-cells

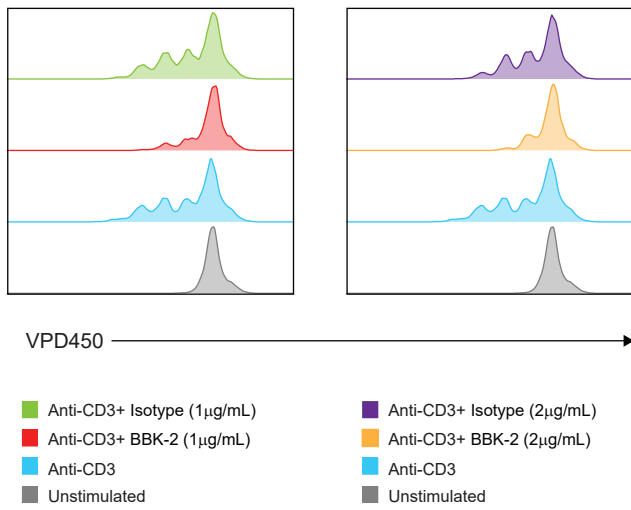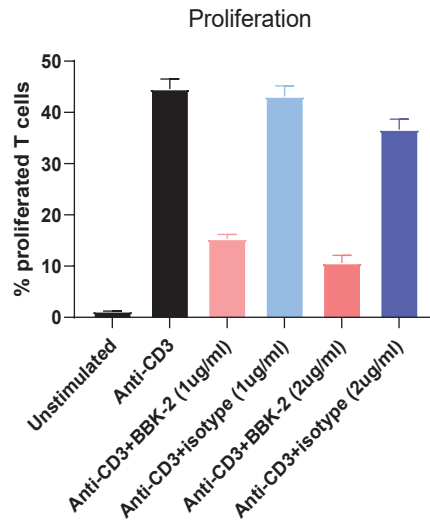

## B T-cell activation (CD25 expression)

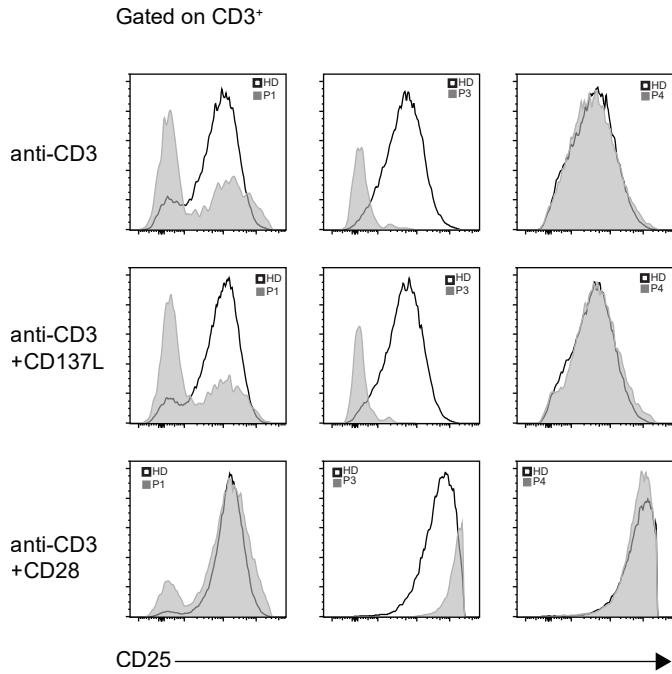

## D TNFSF9 and CD137L expression in T-cells

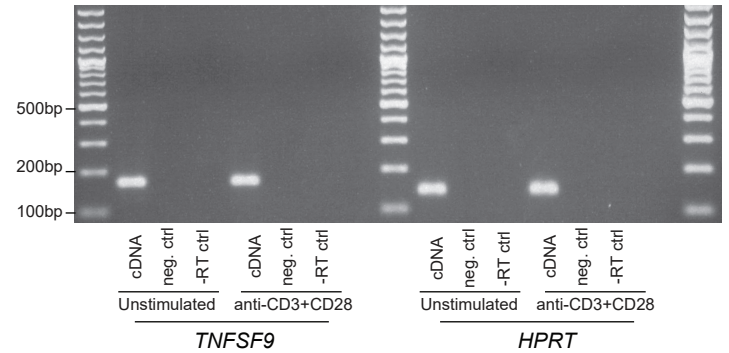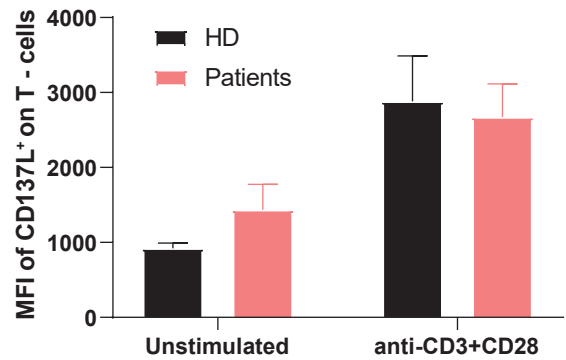

## C Reconstitution of CD137 upon stimulation with anti-CD3 alone

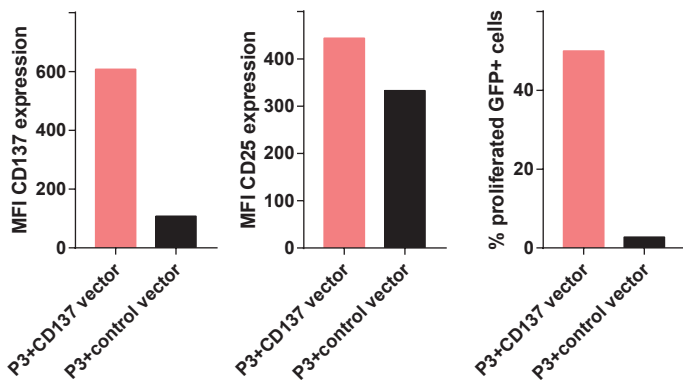

# Supplementary Figure 8

CTL cytotoxicity, NK-cell degranulation and T-cell receptor mediated signaling

## A CTL cytotoxicity

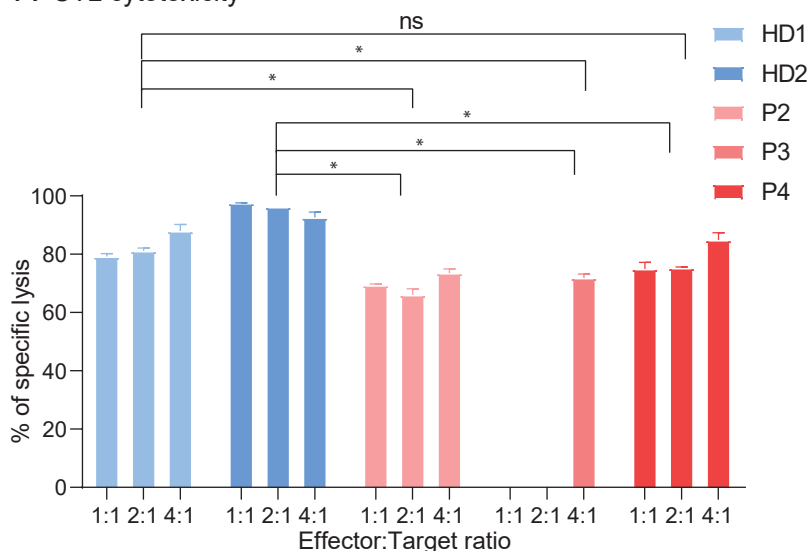

## B CTL degranulation

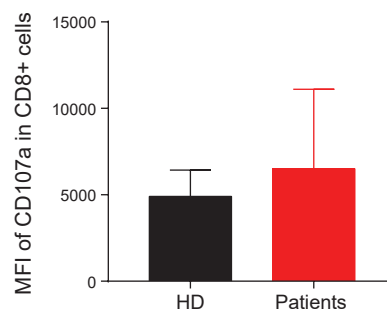

## C NK-cell degranulation

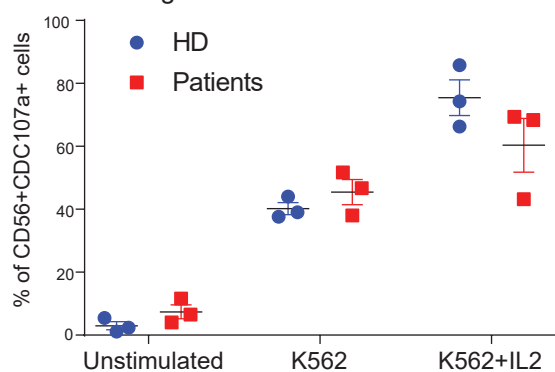

## D NF- $\kappa$ B1 and PI3K/AKT signaling in T-cells

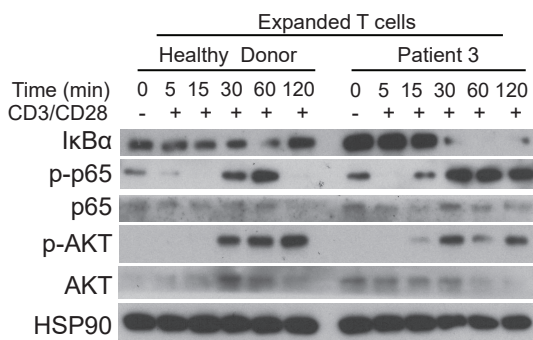

## E MAPK signaling in T-cells

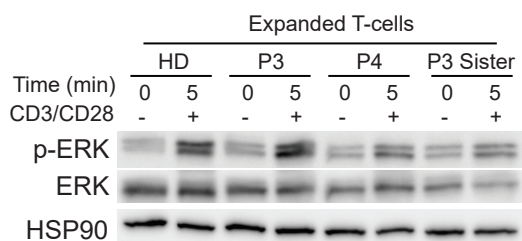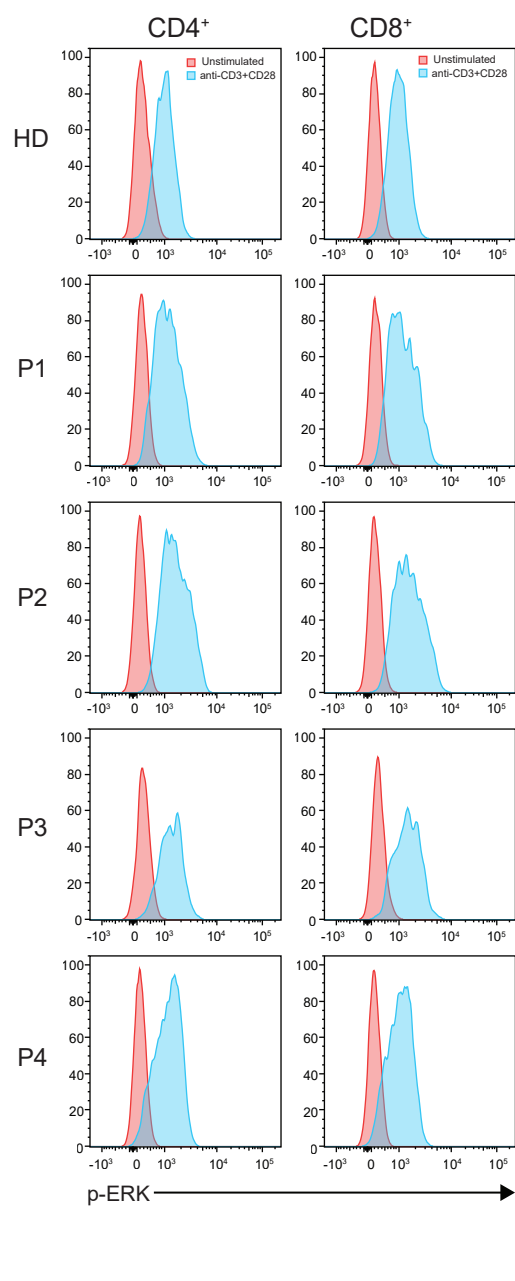

# Supplementary Figure 9

## A *In vitro* plasmablast differentiation

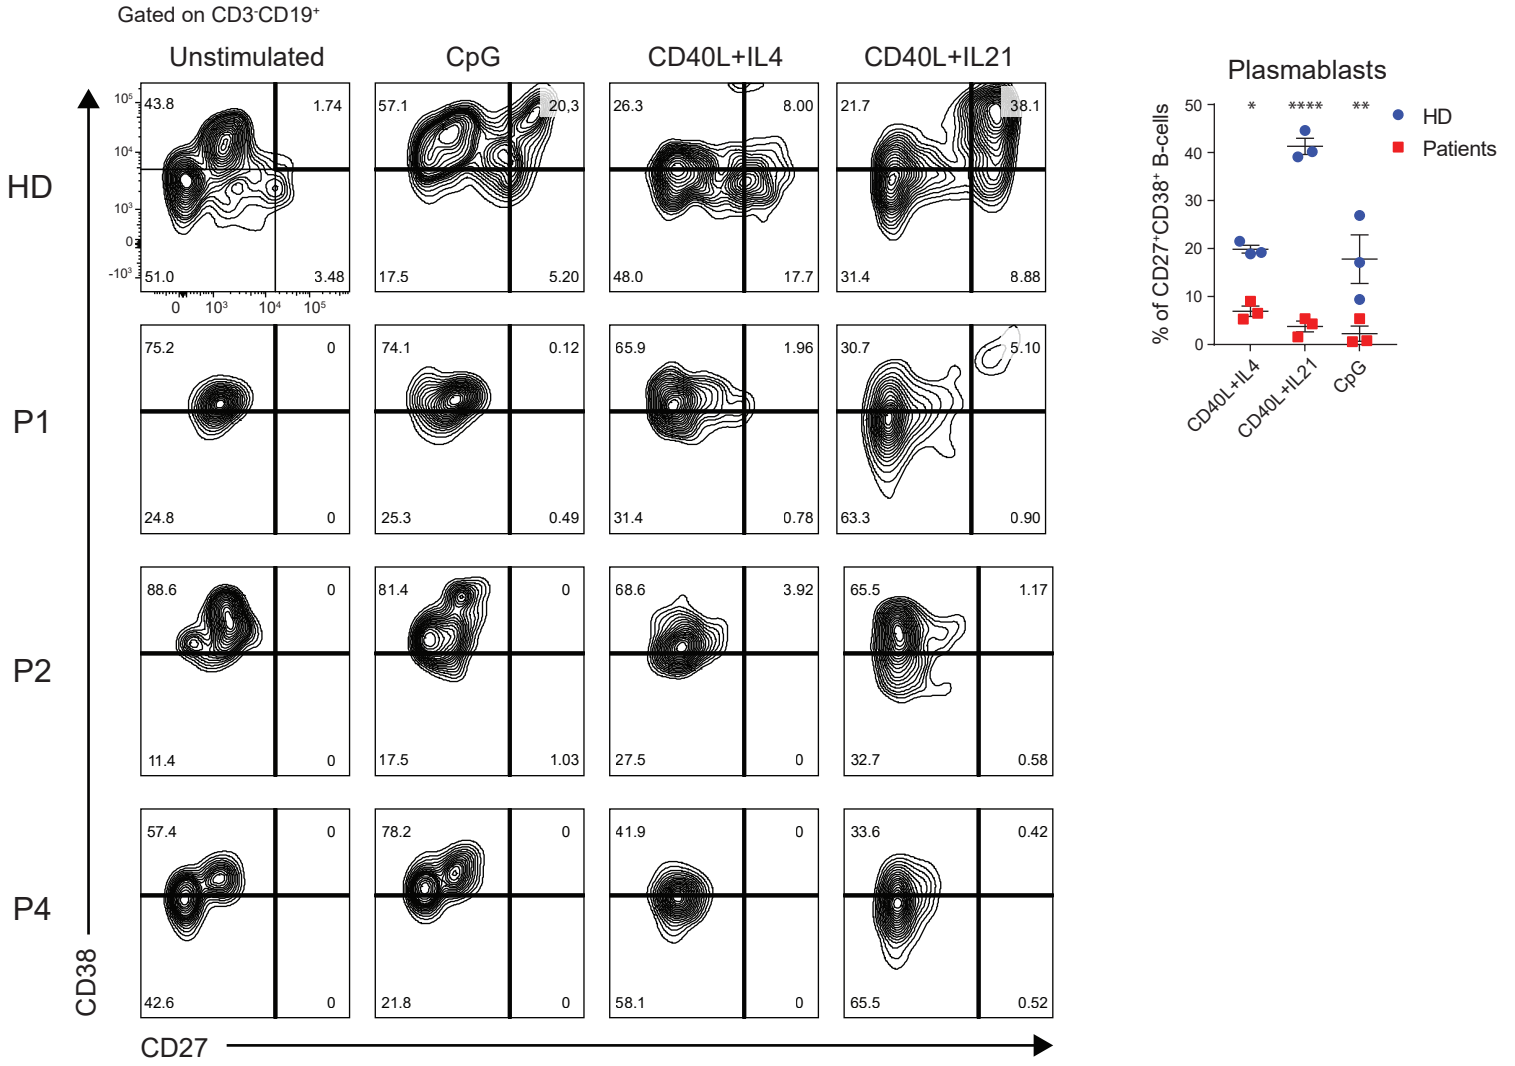

## B CD137L expression on CD19<sup>+</sup> B-cells

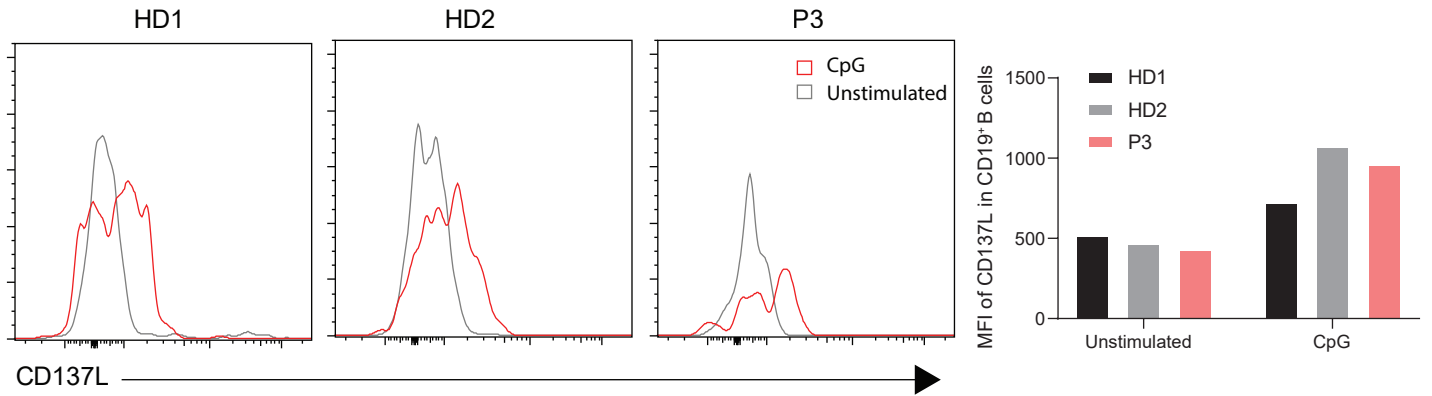



## Supplementary Figure 10

### A CD86 cell surface expression in sorted naive B-cell

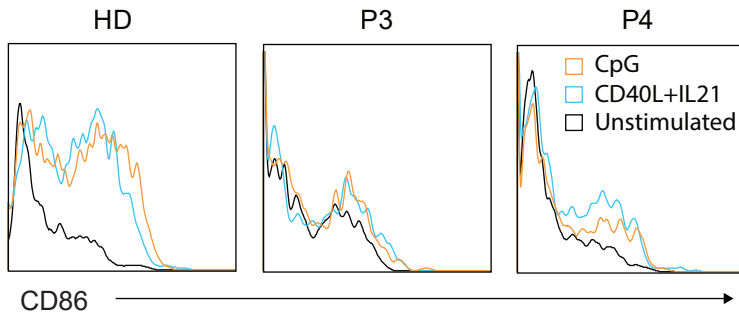

### B Sorted naive B-cell proliferation

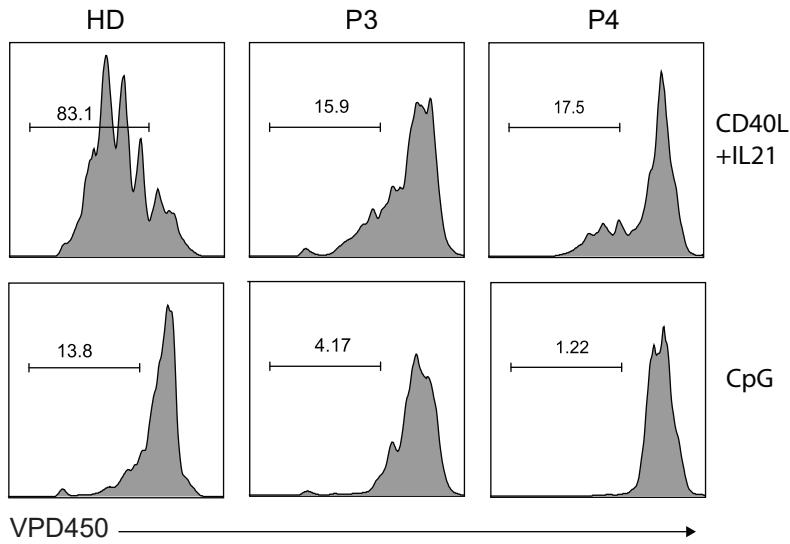

### C Class switch recombination in sorted naive B-cells

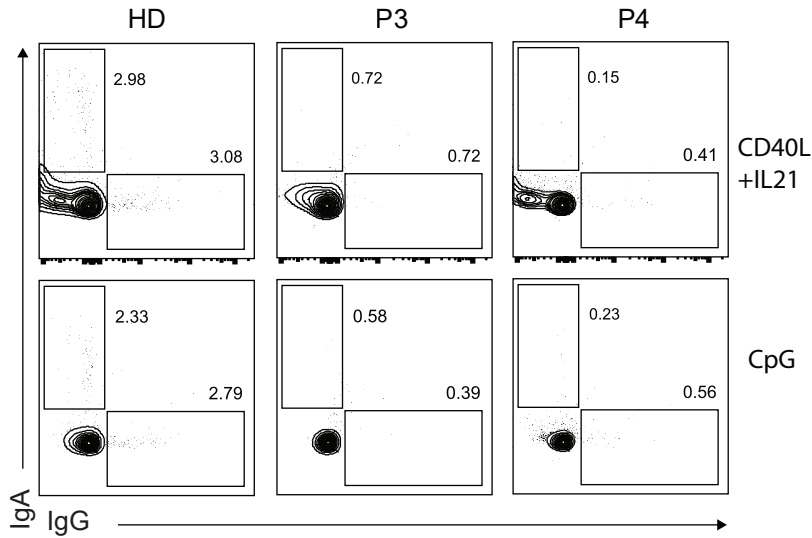

### D CpG stimulation in sorted naive B-cells

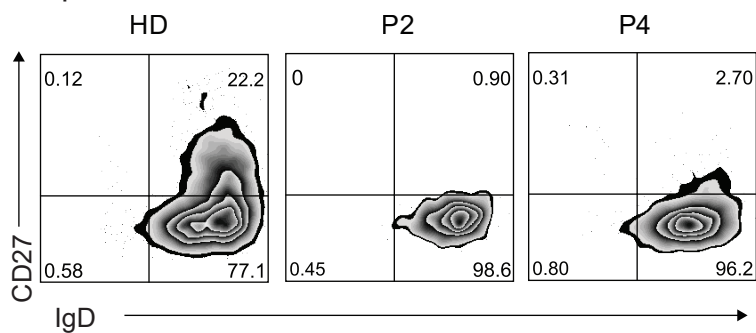

Supplement: bloodBLD2019000644-suppl1.pdf [file bloodBLD2019000644-suppl1.pdf]
